1

2 *To Plant Physiology*

3

4 Short title

5 Role of GPI-anchor on AGP transport and maturation

6

7

8 Correspondence to:

9 Ken Matsuoka

10 Department of Bioscience and Biotechnology, Faculty of Agriculture

11 Kyushu University

12 744 Motooka, Nishi-ku, Fukuoka 819-0395, Japan.

13 e-mail: kenmat@agr.kyushu-u.ac.jp

14 fax: +81-92-802-4713

15

16

17

18 Title

19 **GPI-anchoring is required for the proper transport and glycosylation of**  
20 **arabinogalactan protein precursor**

21

22 Author names and affiliations

23 Daiki Nagasato<sup>1</sup>, Yuto Sugita<sup>1</sup>, Yuhei Tsuno<sup>1</sup>, Rutsuko Tanaka<sup>2</sup>, Ken Matsuoka<sup>1,3</sup>

24

25 1. Department of Bioscience and Biotechnology, Graduate School of Bioresource and  
26 Bioenvironmental Science, Kyushu University

27 2. Chikushigaoka High School

28 3. Department of Bioscience and Biotechnology, Faculty of Agriculture, Kyushu  
29 University

30

31

32

33 **Footnotes**

34 List of author contributions

35 Y.T., R.T. and K.M. performed the experiments on GFP-fusion proteins; D.N. and Y.S.

36 performed the experiments on sporamin-fusion proteins; D.N., Y.T., Y.S. and K.M.

37 designed the experiments and analyzed the data; K.M. conceived the project and wrote  
38 the article with contributions from all the authors.

39

40 Funding information

41 This work was supported in part by JSPS KAKENHI Grant Number 26292194 to K.M.  
42 from the Japan Society for the Promotion of Science.

43

44 E-mail address of Ken Matasuoka, the author for contact: [kenmat@agr.kyushu-u.ac.jp](mailto:kenmat@agr.kyushu-u.ac.jp)

## 45 **Abstract**

46 Arabinogalactan proteins (AGPs) are extracellular proteoglycans with many O-linked  
47 glycan chains. Precursors to many AGPs contain a C-terminal signal for the addition of  
48 a GPI-anchor, yet the role of this modification has not been elucidated. NtAGP1, a  
49 tobacco precursor to AGP, comprises a signal peptide, an AGP-coding region and a  
50 GPI-anchoring signal, and classified as a member of classical AGP. Using green  
51 fluorescent protein (GFP) and sweet potato sporamin (SPO) as tags and tobacco BY-2  
52 cells as the host, we analyzed the transport and modification of NtAGP1. The fusion  
53 protein of GFP or SPO and NtAGP1 expressed in BY-2 cells migrated as a large smear  
54 on SDS-polyacrylamide gel. Confocal microscopic analysis indicated that the GFP and  
55 NtAGP1 fusion protein localized to the plasma membrane (PM), and fractionation  
56 studies of microsomes indicated that the majority of the fusion protein of SPO and  
57 NtAGP1 (SPO-AGP) localized to the PM. In contrast, the expression of mutants  
58 without a GPI-anchoring signal yielded several forms, and the largest forms migrating  
59 as large smears on the gel were secreted into the culture medium, whereas other forms  
60 were recovered in the endomembrane organelles. Comparison of the glycan structures  
61 of the SPO-AGP recovered in microsomes and the secreted mutant SPO-AGP without  
62 a GPI-anchoring signal using antibodies against AGP glycan epitopes indicated that  
63 the glycan structures of these proteins are different. These observations indicated that a  
64 GPI-anchoring signal is required for both the proper transport and glycosylation of the  
65 AGP precursor.

66

67

## 68 **Introduction**

69 Arabinogalactan proteins (AGPs) are plant cell wall proteoglycans with diverse  
70 functions (Pereira et al., 2015). Most of them contain many arabinogalactan (AG)-type  
71 glycan chains attached to Hyp residues that are post-translationally generated by the  
72 action of prolyl hydroxylases (Showalter et al., 2010). These proteins are classified  
73 into at least 5 groups based on their domain composition (Showalter et al., 2010). One  
74 of these groups consists of precursors to the classical AGPs; each of these precursors is  
75 made up of a signal peptide for the translocation of the endoplasmic reticulum (ER)  
76 membrane, glycosylation domains with many proline residues, and a signal sequence  
77 for the attachment of a glycosylphosphatidylinositol (GPI) anchor (Showalter et al.,  
78 2010).

79 GPI-anchor is a class of lipid anchors that retain proteins at the surface of the  
80 plasma membrane (PM), especially within the sphingolipid-sterol rich lipid domain

81 (Liu and Fujita, 2020). Based on analyses of mammalian cells and baker's yeast, it has  
82 been proposed that the biosynthesis of GPI-anchors and their subsequent  
83 modification during transport to the PM proceed as follows. First, biosynthesis of the  
84 GPI-anchor starts at the ER, and then the pre-assembled GPI-anchor is transferred  
85 from the ER to the carboxy-terminus of proteins that contain the GPI-anchoring signal  
86 to yield a GPI-anchored protein. During the subsequent transport to the PM by passing  
87 through the Golgi apparatus, the lipid part of the anchor undergoes remodeling and  
88 changes its structure (Liu and Fujita, 2020). Most of the orthologs of genes that are  
89 dispensable for the biosynthesis and remodeling of GPI-anchors in mammals and yeast  
90 are found in higher plants. However, few of the genes that are predicted to be involved  
91 in this step have been characterized to date, as their null mutants are embryo lethal  
92 (Yeats et al., 2018).

93 The biosynthesis of AG glycan on AGP starts at the ER and *cis*-side of the Golgi  
94 apparatus, where Pro residues are converted to Hyp residues by the action of  
95 prolyl-hydroxylases localized in the ER and *cis*-side of the Golgi apparatus (Yuasa et  
96 al., 2005; Velasquez et al., 2015; Parsons et al., 2018). Subsequent addition of  
97 galactose to the Hyp residue by Hyp galactosyltransferases (Oka et al., 2010; Basu et  
98 al., 2013, 2015; Ogawa-Ohnishi and Matsubayashi, 2015) and building of AG glycan  
99 on the galactose residue in the Golgi apparatus allows maturation of the AGP precursor  
100 (reviewed in Showalter and Basu, 2106). During or after maturation, glycosylated and  
101 GPI-anchored AGPs are transported to the PM, and some of them are released to the  
102 extracellular space by the action of phospholipase in the cell wall. Several enzymes  
103 involved in AGP glycan synthesis have been characterized (reviewed in Showalter and  
104 Basu, 2016), but such enzymes have not yet been characterized completely based on  
105 the structure of the AGP glycans from tobacco BY-2 cells and Arabidopsis (Tan et al.,  
106 2004; Tryfona et al., 2015; Showalter and Basu, 2016).

107 As both the remodeling of the GPI-anchors and maturation of AGP glycans takes  
108 place in the Golgi apparatus, there may be a linkage between these two modifications.  
109 The Golgi apparatus is an organelle located in the endomembrane transport system,  
110 and this system directs proteins to several destinations including the PM, extracellular  
111 space and vacuoles. As such, GPI-anchoring might play a role in the proper transport  
112 of proteins. However, this possibility has not been adequately investigated, especially  
113 with respect to the transport of AGP. It has been reported that GPI-anchoring is  
114 dispensable for PM localization of the Citrin-fused FLA4 protein, a fasciclin-domain  
115 containing AGP in Arabidopsis (Xue et al., 2017). In this case, most of the green  
116 fluorescence of the mutant Citrin-FLA4 lacking a GPI-anchoring signal appeared to be

117 retained in the ER, and only a part of the green fluorescence from this protein seemed  
118 to be secreted to the extracellular space, although this partial secretion was sufficient to  
119 complement the mutant phenotype of *fla4* (Xue et al., 2017). Although this observation  
120 indicates that GPI-anchoring is required for the proper localization of this protein, this  
121 observation may not be applied to other classes of AGP; for example, classical AGP,  
122 which does not contain a fasciclin-domain and almost all of the mature polypeptide  
123 region is predicted to be heavily glycosylated with AG glycans (Showalter et al.,  
124 2010).

125 Here we investigated the role of GPI-anchoring on the transport and glycosylation  
126 of tobacco NtAGP1 (GenBank BAU61512), which is a classical AGP expressed in  
127 tobacco BY-2 cells, by expressing two different protein-tagged versions in tobacco  
128 BY-2 cells. We present evidence that GPI-anchoring is required for both the proper  
129 transport and the proper glycosylation of this protein.

130

131

## 132 **Results**

133 *Expression of the GFP-NtAGP1 fusion protein and its mutant without a*  
134 *GPI-anchoring signal in tobacco BY2-cells*

135 The precursor to NtAGP1 consists of 132 amino acids; a signal peptide of 21 amino  
136 acids, a glycosylation domain of 86 amino acids and a GPI-anchoring signal of 25  
137 amino acids. Within the glycosylation region there are 23 Pro residues, all of which are  
138 surrounded with amino acids that make up the targeting sites for prolyl hydroxylases  
139 (Shimizu et al., 2005). Among these proline residues, 15 fit to the  
140 arabinogalactosylation site (Shimizu et al., 2005), and the remaining 8 are contiguous  
141 prolines that might form the site for the attachment of oligo-arabinose (Xu et al., 2008).  
142 Because most of the distances between the proline residues in NtAGP1 are equal to or  
143 less than 5 amino acids, and because the minimum length of a peptide epitope is 6  
144 amino acid residues (Singh et al., 2013), we thought that it would be almost impossible  
145 to generate an antibody against the peptide sequence of NtAGP1 to detect the native  
146 protein in tobacco tissues and cells. We thus adopted the alternative approach of  
147 expressing fusion proteins consisting of NtAGP1 and protein tags and characterizing  
148 these proteins in tobacco BY-2 cells.

149 We first generated a construct for the expression of a fusion protein containing  
150 green fluorescence protein (GFP) between the signal peptide and the subsequent region  
151 of NtAGP1 (GFP-AGP). We also generated a mutant of this protein without a  
152 GPI-anchoring signal (GFP-AGP $\Delta$ C) and a signal peptide with GFP only (GFP)

153 (Fig.1A). These proteins as well as the fusion proteins of the PM water channel and  
154 GFP (PIP-GFP: Yamauchi et al., 2003) were expressed in tobacco BY-2 cells, and the  
155 resulting transformed cells were cultured in suspension. We then analyzed the GFP  
156 fluorescence of proteins in these transformed cell cultures that were grown for either 3  
157 days (to the logarithmic growth phase) or 7 days (to the stationary growth phase) after  
158 separation of proteins by SDS-PAGE and fluorescence recording (Fig. 1B). The  
159 fluorescence of GFP-AGP migrated as a large smear at around the 200 kDa position,  
160 and the intensity of this signal was stronger at 7 days. In the case of GFP-AGP $\Delta$ C, at  
161 least three smear bands were observed: two bands that migrated to the 120 kDa and 48  
162 kDa positions, and a relatively sharp band that migrated to around the 37 kDa position,  
163 the size of which corresponded to the non-glycosylated form of this approximately  
164 35-kDa protein (Fig. 1B). Among these proteins, the largest form migrated more  
165 slowly at 7 days than that at 3 days on the SDS-polyacrylamide gel. The control  
166 proteins, GFP and PIP-GFP, migrated to the corresponding position on the  
167 SDS-polyacrylamide gel, as expected.

168 To determine the localization of these GFP-fusion proteins, cultures of the  
169 transformed cells were separated into medium, cell wall, cellular membrane and  
170 cellular soluble fractions. Proteins in these fractions were separated, and the  
171 distribution of the GFP-fusion proteins was analyzed (Fig. 1C). GFP-AGP was  
172 recovered predominantly in the membrane fraction and to a lesser extent in the soluble  
173 fraction, and trace amounts were present in the cell walls and culture medium. In the  
174 case of GFP-AGP $\Delta$ C, most of the large smear was recovered in the medium, and a  
175 small amount of this form was also found in the membrane and soluble fractions. In  
176 contrast, almost all the 48-kDa form was recovered in the membrane fraction and the  
177 smallest 37-kDa form was recovered in the soluble fraction. In the case of PIP-GFP,  
178 which was used as the fractionation control, most of this protein was recovered in the  
179 membrane fraction with a trace amount in the cell walls, and faint signals of smaller  
180 forms, possibly truncated ones, were detected in the soluble fraction.

181 We next addressed the distribution of the GFP fluorescence from 7-day-old cells  
182 expressing either GFP-AGP or GFP-AGP $\Delta$ C by confocal laser scanning microscopy  
183 (CLSM) (Fig. 2). Almost all the green fluorescence in GFP-AGP-expressing cells was  
184 localized at the cell surface, possibly at the PM, and a very faint signal was observed in  
185 the vacuoles (Fig. 2A & B). In contrast, cells expressing GFP-AGP $\Delta$ C showed weak  
186 green fluorescence in the vacuoles with an unidentified punctate structure with green  
187 fluorescence close to the cell wall (Fig. 2C & D). The latter punctate signal could have

188 been the autofluorescence of the cells, since a similar signal was also detected in  
189 non-transformed cells (Fig. 2E & F).

190 To determine whether the green fluorescence from GFP-AGP-expressing cells was  
191 localized to the PM, we observed the cells after plasmolysis (Fig. 2G). The clear line of  
192 a green fluorescence signal, which corresponded to a Hechtian strand, was visible  
193 between the PM and cell walls. This indicated that GFP-AGP was localized to the PM.  
194 To further confirm that the GFP-AGP signal was localized in the PM, the cells were  
195 incubated for 5 min with FM 4-64, and both the green and red fluorescence were  
196 recorded (Fig. 2H-J). The green and red fluorescence colocalized well, although the  
197 intensity of the green signal did not appear to be uniform. This observation also  
198 confirmed that GFP-AGP was localized to the PM. To assess the non-uniform  
199 localization of GFP-AGP at the PM, Z-stack images were collected by CLSM and then  
200 a 3D image was reconstituted (Supplemental movie 1). The non-uniform distribution  
201 of GFP fluorescence was apparent in the reconstituted 3D image. These data indicated  
202 that GFP-AGP was predominantly localized to the PM with non-uniform distribution.

203 Although these data suggested that NtAGP1 is a PM protein, we could not confirm  
204 this localization by the result of the expression of only one fusion protein, and also we  
205 found it difficult to further characterize GFP-AGP for several reasons. First, the green  
206 fluorescence from GFP-AGP was unstable in the stably-transformed tobacco BY-2  
207 cells, and within six weeks of subculture, almost all the cells stopped emitting green  
208 fluorescence. Secondly, the signal peptide-GFP fusion protein was not fully secreted to  
209 the culture medium from tobacco BY-2 cells (Mitsuhashi et al., 2000). Thus, GFP  
210 alone may not be a good cargo for secretion, the flow path that may be the default  
211 pathway from the ER in the endomembrane transport system. Thirdly, we have a  
212 fluorescence pulse-chase system using a photo-convertible fluorescence protein,  
213 mKikGR (Habuchi et al., 2008) that have similar higher order structure with GFP, to  
214 monitor the turnover of proteins (Abiodun and Matsuoka, 2013). Therefore, we tried to  
215 apply this system to address the transport of NtAGP1 by expressing the fusion protein  
216 of mKikGR and NtAGP1 in tobacco BY-2 cells. Unfortunately, the fusion protein  
217 migrated with three distinct bands: a weak large smear that migrated at a position  
218 similar to GFP-AGP, a predominant band around 60 kDa, and a weaker band around  
219 50 kDa (Supplemental Fig. 1). We therefore tested the transport and modification of  
220 NtAGP1 using a protein with structurally distinct from GFP as a tag to determine the  
221 localization and transport of this protein and its mutant lacking a GPI-anchoring signal.  
222



223 *Expression and localization of the sporamin-NtAGP1 fusion protein and its mutant*  
224 *lacking an GPI-anchoring signal in tobacco BY2-cells*

225 We used sweet potato sporamin as another protein tag to address the transport,  
226 localization and modification of NtAGP1 and its derivative lacking a GPI-anchoring  
227 signal. Sporamin is a monomeric soluble and non-glycosylated storage protein of sweet  
228 potato (Maeshima et al., 1985) localized in the vacuoles (Hattori et al., 1988).  
229 Expression of a mutant precursor to sporamin, which does not contain the propeptide  
230 region but does contain the signal peptide for secretion in tobacco BY-2 cells, allowed  
231 the efficient secretion of this protein to the medium (>90% of this pulse-labeled protein  
232 is secreted within 2 h of chase) (Matsuoka and Nakamura, 1991). The junction region  
233 between the propeptide and the mature sporamin surrounding the 36th Pro residue  
234 consists of a cryptic Hyp O-glycosylation site for AG, and thus both a wild-type  
235 precursor to sporamin as well as mutant precursors with a disrupted vacuolar targeting  
236 signal are O-glycosylated when expressed in tobacco BY-2 cells (Matsuoka et al., 1995,  
237 Matsuoka and Nakamura, 1999). The efficiency of secretion of mutants with a  
238 disrupted vacuolar targeting signal is comparable to that of the mutant without the  
239 propeptide (Matsuoka and Nakamura, 1999). In other words, the secretion efficiency of  
240 sporamin is not affected by the presence or absence of O-glycosylation. We thus chose  
241 sporamin as another protein tag to analyze the transport and modification of NtAGP1  
242 and its mutant lacking a GPI-anchoring signal.

243 The expression constructs for the signal peptide-sporamin-mature NtAGP1 with a  
244 GPI-anchoring signal (SPO-AGP) or those for the signal peptide-sporamin-mature  
245 NtAGP1 without a GPI-anchoring signal (SPO-AGP $\Delta$ C) (Fig. 3A) were expressed in  
246 tobacco BY-2 cells. Cell and medium fractions were prepared from stationary-grown  
247 transformed BY-2 culture, and then the intra- and extra-cellular localizations of  
248 sporamin or its fusion proteins in these fractions were examined by immunoblotting  
249 either directly without immunoprecipitation (Fig. 3B) or after target proteins were  
250 recovered by immunoprecipitation (Fig. 3C). Immunoblotting without  
251 immunoprecipitation gave cross-reacted protein bands in proteins from  
252 non-transformed cells (Fig. 3B, WT). Such signals were absent after  
253 immunoprecipitation (Fig. 3C, WT). However, comparison of the intensities of  
254 sporamin-related signals on many immunoblots carried out under both these conditions  
255 indicated that the recovery by immunoprecipitation varied among the proteins,  
256 especially SPO-AGP. Thus, we did not use immunoprecipitation for the subsequent  
257 quantitative analysis, and always included a negative control from non-transformed  
258 cells.



259 SPO-AGP was detected as a smear band close to the top of the  
260 SDS-polyacrylamide gel (Figs. 3B, C). This observation indicated that SPO-AGP was  
261 glycosylated. Most of the smear-migrating protein was recovered in the cell fraction  
262 (Fig. 3B). On the other hand, SPO-AGP $\Delta$ C was detected as three distinct species with  
263 different migration positions; a large form that migrated at the 90-120 kDa position, an  
264 intermediate form at the 36 kDa position and a small one at the 22 kDa position (Figs.  
265 3B, C). A specific band that migrated at the front of electrophoresis gel may have been  
266 the degradation product of SPO (Figs. 3B). A large SPO-AGP $\Delta$ C was detected in both  
267 the cell and medium fractions. Because the molecular weight of non-glycosylated  
268 SPO-AGP $\Delta$ C is calculated as 27.5 kDa, this observation indicated that most of the  
269 large SPO-AGP $\Delta$ C was glycosylated and secreted into the extracellular space. The  
270 intermediate and small SPO-AGP $\Delta$ C were detected in cell fractions. This observation  
271 suggests that they were localized in the cells. The small form may be the degradation  
272 product, since its size (22 kDa) was similar to that of SPO (Fig. 3C) and smaller than  
273 the calculated size of the non-glycosylated form of SPO-AGP $\Delta$ C.

274 To reveal the intracellular localization of SPO-AGP and SPO-AGP $\Delta$ C, we  
275 performed subcellular fractionation by differential centrifugation. Cell lysates were  
276 centrifuged at 1,000g and the precipitate, defined as the P1 fraction, which contained  
277 unbroken cells, nuclei and cell walls, was collected. The supernatant was centrifuged at  
278 10,000g and the precipitate (P10), which contained most of the mitochondria and  
279 plastids, was collected. The resulting supernatant was further centrifuged at 100,000g  
280 and the obtained precipitate (P100) contained microsomal membranes. The supernatant,  
281 which was defined as the S fraction, was also collected. SPO-AGP was detected in the  
282 P1, P100 and S fractions (Fig. 3D). In the case of SPO-AGP $\Delta$ C, the large and small  
283 forms were detected in the P1 and S fractions, while the intermediate form was  
284 observed in all fractions (Fig. 3E).

285 To address the localization SPO-AGP, which was recovered in the P100 fraction,  
286 we prepared microsomal membranes from transformed BY-2 cells expressing  
287 SPO-AGP using buffers containing either MgCl<sub>2</sub> or EDTA, and then separated the  
288 membranes by equilibrium sucrose density gradient centrifugation in the presence or  
289 absence of Mg<sup>2+</sup>, respectively. The distribution of SPO-AGP in these separated  
290 fractions was examined by immunoblotting (Fig. 4). The distributions of marker  
291 proteins were also analyzed by immunoblotting with specific antibodies: Sec61 for the  
292 ER (Yuasa et al., 2005), vacuolar pyrophosphatase (V-PPase) for tonoplast (Toyooka  
293 et al., 2009), GLMT1 for the Golgi apparatus (Liu et al., 2015), plasma membranous  
294 ATPase (P-ATPase) for PM (Toyooka et al., 2009) and PM water channel (PIP) for

295 PM (Suga et al., 2001). In the presence of  $Mg^{2+}$  (Fig. 4A), SPO-AGP migrated in  
296 several fractions, mainly in the fractions corresponding to 41-44(w/w)% sucrose.  
297 Quantification of the intensities of these immunoblot signals indicated that the  
298 migration pattern of SPO-AGP was similar to those of P-ATPase and PIP, the markers  
299 of the PM. In the absence of  $Mg^{2+}$  (Fig. 4B), SPO-AGP also migrated with a peak at  
300 around 41-43(w/w)% sucrose. This migration pattern was also similar to that of  
301 P-ATPase and PIP. These fractionation data indicated that SPO-AGP was localized to  
302 the PM.

303

#### 304 *Intracellular localization of SPO-AGPΔC*

305 We prepared protoplasts from transformed BY-2 cells expressing SPO-AGPΔC in  
306 order to determine which forms of SPO-AGPΔC were localized outside of the PM (Fig.  
307 5A). The large SPO-AGPΔC was detected only in cells and was not detected in  
308 protoplasts. The intermediate protein was detected in both cells and protoplasts,  
309 although the amount was smaller in protoplasts than in cells. The small SPO-AGPΔC  
310 was detected in both of these fractions in nearly equal amounts. This result indicated  
311 that the large SPO-AGPΔC was localized in the periplasm and cell wall, intermediate  
312 SPO-AGPΔC was localized in both the periplasm and the cells, and the small  
313 SPO-AGPΔC was localized almost exclusively in the cells.

314 To address whether some of the intracellular SPO-AGPΔC was localized in  
315 vacuoles, we separated protoplasts into vacuoplast and cytoplasm fractions and analyzed  
316 the amounts of the different forms of SPO-AGPΔC in these fractions. The vacuoplasts  
317 are composed of vacuoles surrounded with the PM, and cytoplasm fractions are composed of  
318 cytoplasm, nuclei and PM. We measured the protein concentration in the protoplast  
319 and cytoplasm fractions, and  $\alpha$ -mannosidase activity in the protoplast and vacuoplast  
320 fractions. Thereafter, proteins that were present in the protoplast and cytoplasm  
321 fractions in nearly equal amounts, and proteins that were present in protoplast and  
322 vacuoplast fractions in amounts almost equivalent to the levels of  $\alpha$ -mannosidase  
323 activity were separated by SDS-PAGE, and the different forms of SPO-AGPΔC in  
324 these fractions were detected by immunoblotting (Fig. 5B). Mitochondrial porin was  
325 used as a fractionation control. The intermediate SPO-AGPΔC was detected in the  
326 protoplast and cytoplasm fractions in nearly equal amounts relative to the protein,  
327 whereas the small form was detected in both the protoplast and vacuoplast fractions in  
328 amounts similar to the activity of  $\alpha$ -mannosidase. This result suggests that the small  
329 SPO-AGPΔC was localized in vacuoles and the intermediate SPO-AGPΔC was  
330 localized in other intracellular compartments.

331 To investigate the localization of the intermediate SPO-AGPΔC in cells, we  
332 prepared microsomal fractions from transformed BY-2 cells expressing SPO-AGPΔC  
333 in buffers containing either MgCl<sub>2</sub> or EDTA. The microsomal membranes were  
334 separated by equilibrium sucrose density gradient centrifugation in the presence or  
335 absence of Mg<sup>2+</sup>, respectively. The distribution of the intermediate SPO-AGPΔC in  
336 these separated fractions was examined by immunoblotting and compared to the  
337 distributions of marker proteins in the secretory organelles (Fig. 5C, D). In the  
338 presence of Mg<sup>2+</sup> (Fig. 5C), the intermediate SPO-AGPΔC migrated in several  
339 fractions with a peak at around 39-42 (w/w)% sucrose. This migration pattern was  
340 similar to that of Sec61, a marker of the ER membrane. In the absence of Mg<sup>2+</sup> (Fig.  
341 5D), the intermediate SPO-AGPΔC also migrated with a peak at around 31-34(w/w)%  
342 sucrose, and the peak shifted to a lower-density position compared with that in the  
343 presence of Mg<sup>2+</sup>. This shift corresponded to that of the migration pattern of Sec61  
344 (ER marker). These fractions did not contain P-ATPase and PIP but did contain  
345 GLMT1, the marker of the Golgi apparatus. These fractionation data suggest that the  
346 intermediate SPO-AGPΔC is localized predominantly in the ER and partly in the Golgi  
347 apparatus.

348

#### 349 *NtAGP1 is a GPI-anchored protein*

350 The NtAGP1 precursor contains a GPI-anchoring signal at its C-terminus. We showed  
351 that GFP-AGP and SPO-AGP were localized to the PM (Figs. 2 and 5). To determine  
352 whether the GPI-anchoring signal on the NtAGP1 precursor is functional and whether  
353 the GPI-anchor attached to NtAGP was responsible for attaching this protein to the PM,  
354 we analyzed the distribution of these fusion proteins recovered in the microsomal  
355 fraction by two-phase separation using Triton X-114. A nonionic detergent such as  
356 Triton X-114 can be used to make a uniform solution at low temperature, which can  
357 then be separated into two phases, such as an aqueous (aqu) phase and a detergent-rich  
358 (det) phase, at higher temperature. By taking advantage of this characteristic of the  
359 nonionic detergent, a cell extract can be separated into soluble and peripheral  
360 membrane proteins that can be recovered in the aqu phase, and integral membrane  
361 proteins as well as lipid-anchored proteins that can be recovered in the det phase  
362 (Bordier, 1981).

363 Around half of the GFP-AGP (Fig. 6A, left), as well as almost all of the SPO-AGP  
364 (Fig. 6B, top left) and almost all of the PIP-GFP (an integral membrane protein used as  
365 an experimental control; Fig. 6A, right), was recovered in the det fraction. Under the  
366 same separation condition, almost all the smear-migrating GFP-AGPΔC and

367 SPO-AGP $\Delta$ C were recovered in the aqu fraction. These observations suggested that  
368 around half of the GFP-AGP and almost all of the SPO-AGP were localized to the PM  
369 with their GPI-anchors. To address whether this membrane-association is actually  
370 mediated by the GPI-anchor attached to these proteins, two-phase separation  
371 experiments were carried out in the presence of phosphatidylinositol-specific  
372 phospholipase C (PI-PLC), which can cleave the phosphodiester bond in a GPI-anchor  
373 (reviewed by Hopper, 2001). In the presence of PI-PLC, almost all the GFP-AGP in  
374 the microsomal fraction was recovered in the aqu phase (Fig. 6C, right). Likewise,  
375 around half of the SPO-AGP that was recovered in the TX-114 phase was recovered in  
376 the det phase (Fig. 6D, top). Under the same condition, vacuolar pyrophosphatase,  
377 which is an integral membrane protein used as a control, was recovered almost  
378 exclusively in the det phase (Fig. 6D, bottom). These observations indicated that  
379 roughly half of both GFP-AGP and SPO-AGP was anchored to the PM by a  
380 GPI-anchor that was sensitive to PI-PLC and suggested that NtAGP1 is a  
381 GPI-anchored protein at the PM.

382

### 383 *GPI-anchoring is required for the proper assembly of AGP glycan*

384 We showed that the migration position of the smear-migrating SPO-AGP and  
385 SPO-AGP $\Delta$ C on SDS-polyacrylamide gel were different (Fig. 3A, B). We considered  
386 that this difference might be due to the difference in AG glycan chains on these  
387 proteins. To address this possibility, we examined the reactivity of anti-AG glycan  
388 monoclonal antibodies (mABs) to these proteins. Among the mABs that we tested,  
389 SPO-AGP $\Delta$ C was specifically recognized by LM2 (Fig. 7B). In addition, both proteins  
390 were recognized by LM6 (Fig. 7C). Other antibodies, namely PN16.4B4, CCRC-M7,  
391 MAC204, and MAC207, did not recognize both proteins. Because LM2 recognizes  
392 terminal  $\beta$ -glucuronic acid ( $\beta$ -GlcA) (Yates et al., 1996), the absence of recognition of  
393 SPO-AGP by this antibody indicated that such a structure was absent in the glycan in  
394 SPO-AGP. This result also suggested that GPI-anchoring is required for the proper  
395 assembly of AGP glycan.

396

## 397 **Discussion**

398 In this work we investigated the role of the GPI-anchor on the transport and  
399 modification of NtAGP1, a classical AGP in tobacco. The expression of the GFP  
400 fusion protein in tobacco BY-2 cells allowed us to detect the smear-migrating  
401 GFP-fusion protein with low mobility on SDS-polyacrylamide gel (Fig. 1). This  
402 behavior of the fusion protein was consistent with the typical migration pattern of AGP

403 in many plant species (e.g., Putoczki et al., 2007; Yang and Showalter, 2007; Lind et  
404 al., 1994; Maurer et al., 2010). In contrast, the fusion protein formed using another  
405 fluorescent protein, mKikGR (Habuchi et al., 2008), yielded one slow-migrating and  
406 two fast-migrating smear bands (Supplemental fig. 1). To determine which of the  
407 observed migration behaviors of these fusion proteins represented the true nature of  
408 NtAGP1, we characterized another fusion protein formed with sporamin and found that  
409 this fusion protein migrated as a slow-migration smear band on SDS-polyacrylamide  
410 gel (Fig. 3). We therefore concluded that the slow migration and formation of a smear  
411 band on SDS-polyacrylamide gel are characteristic of NtAGP1. These observations  
412 also suggested that differences in the non-glycosylated region of AGP may affect the  
413 degree of modification of the protein.

414 Analyses of the localization of GFP-AGP and SPO-AGP indicated that most of  
415 these proteins were localized to the PM (Figs. 2A, G, H and Fig. 4), and that both  
416 proteins were attached to the PM as GPI-anchored forms (Fig. 6). In addition, some of  
417 these proteins were recovered in the medium and were also present in the periplasmic  
418 space. These observations suggested that NtAGP1 is a GPI-anchored PM protein,  
419 although some NtAGP1 is also released to the extracellular space following cleavage  
420 of its GPI-anchor, possibly via the actions of phospholipase in the extracellular space.

421 In contrast to the fusion proteins with an intact AGP with GPI-anchoring signal,  
422 mutant fusion proteins without a GPI-anchoring signal—namely, GFP-AGP $\Delta$ C and  
423 SPO-AGP $\Delta$ C—were detected as multiple bands at different migration positions on  
424 SDS-polyacrylamide gels (Figs. 1 and 3). The glycosylated forms of these proteins that  
425 migrated the most slowly and most readily formed smear bands were predominantly  
426 recovered in the medium fraction (Figs. 1 and 3). Fractionation analysis of cells  
427 expressing these proteins indicated that the intermediate forms were recovered partly  
428 in the membranous organelles in the cells and partly in the periplasmic space (Figs. 1  
429 and 3). The migration positions of these proteins on SDS-polyacrylamide gels were  
430 slower than those of the calculated size of non-glycosylated forms of these proteins,  
431 suggesting that these proteins are modified to some extent, probably with glycans.  
432 Purification of these proteins and analysis of their sugar compositions will clarify  
433 whether such modification takes place.

434 The fractionation study of microsomes from SPO-AGP $\Delta$ C-expressing cells  
435 indicated that the intermediate SPO-AGP $\Delta$ C was localized in the ER with partial  
436 localization in the Golgi (Fig. 5). The smallest forms of this protein, which was similar  
437 in size to SPO, was recovered in the soluble fraction from the cells, which consisted of  
438 the cytoplasm and vacuolar sap. The smallest form of SPO-AGP $\Delta$ C was also recovered



439 in the vacuoplast fraction. These observations indicated that some of the SPO-AGP $\Delta$ C  
440 protein was transported to the vacuoles, while most of the AGP part of these proteins  
441 was cleaved off or degraded in the vacuoles.

442 These observations indicated that GPI-anchoring is not only essential for the  
443 proper and efficient transport of NtAGP1 to the plasma membrane or extracellular  
444 space but also required for the efficient glycosylation. Some of the inefficiently-modified  
445 forms, the intermediate forms, were retained in the ER, and some of them could also be  
446 transported to the vacuoles for degradation. These observations were partly consistent  
447 with the case of a Citrin-tagged and GPI-anchoring signal-deleted fasciclin-like AGP  
448 mutant (Xue et al., 2017). In this case, most of the mutant protein was retained in the  
449 ER. In our present experiments, however, vacuolar localization was observed. This  
450 difference in vacuolar localization between the previous report and our present study  
451 might be attributable to either the different detection systems or different proteins used.

452 It has been reported that the vacuoles are scavenger organelles that degrade  
453 damaged proteins and organelles. In yeast, it has been shown that vacuolar targeting is  
454 a mechanism for degrading improperly folded proteins in the ER, and this transport is  
455 mediated by a receptor for vacuolar targeting (Hong et al., 1996). In plants, targeting of  
456 soluble proteins to the lytic vacuoles (such as the central vacuoles in tobacco BY-2  
457 cells) is mediated by VSR proteins (reviewed in Shimada et al., 2018). Large and  
458 hydrophobic residues, such as Ile and Leu, in the vacuolar-sorting determinants in  
459 proteins play a pivotal role in the targeting (Ahmed et al., 2000; Brown et al., 2003;  
460 Matsuoka and Nakamura, 1995, 1999; Paris et al., 1997). Therefore, it is interesting  
461 that inefficient glycosylation of SPO-AGP $\Delta$ C may cause the exposure of a large and  
462 hydrophobic side chain in the mature region of AGP, and this characteristic of  
463 SPO-AGP $\Delta$ C may have allowed the targeting of this protein to the vacuole after  
464 recognition by VSR proteins, as in the case of yeast (Hong et al., 1986). In fact, the  
465 SPLA sequence at amino acid positions 67 to 70 of the NtAGP1 precursor resembles  
466 the NPIR vacuolar sorting determinants of sporamin and aleurain propeptides  
467 (Matsuoka and Nakamura, 1995, 1999; Paris et al., 1997), and this region may be a  
468 good candidate for a region that is exposed under inefficient glycosylation.

469 Not only the mislocalization but also alteration of the glycan moiety was observed  
470 in the secreted SPO-AGP $\Delta$ C from SPO-AGP (Fig. 7). Secreted SPO-AGP $\Delta$ C was  
471 recognized by the mAB LM2, which was previously shown to recognize  $\beta$ -glucuronic  
472 acid ( $\beta$ -GlcA) residues in AG glycan (Yates et al., 1996). Competition analysis  
473 suggested that further modification to the  $\beta$ -GlcA moiety abolished the binding (Yates  
474 et al., 1996). It has been shown that the structure of the glycan moiety of artificial AGP

475 secreted from tobacco BY-2 cells contains  $\beta$ -GlcA, which is further modified partly by  
476 rhamnose (Tan et al., 2004, 2010). In addition, the  $\beta$ -GlcA moiety of AGP is  
477 sometimes methylated by the action of DUF576 family methyltransferases (Temple et  
478 al., 2019). Thus, it is possible that the glycan structure of secreted SPO-AGP $\Delta$ C is  
479 similar to that of the artificial AGPs, which contain a terminal  $\beta$ -GlcA, whereas such a  
480 structure is absent in SPO-AGP, and that this difference is achieved by an efficient  
481 modification with rhamnose or methyl residues. Future analysis of the sugar  
482 compositions of the purified SPO-AGP and secreted SPO-AGP $\Delta$ C proteins will be  
483 needed to fully explore these possibilities.

484       What causes the difference in glycan structure between SPO-AGP and secreted  
485 SPO-AGP $\Delta$ C? One possible answer may be related to the difference in transport routes  
486 of these proteins in the late secretory pathway, with different distributions of the  
487 enzymes responsible for modification for the AGP glycan. It was shown in tobacco  
488 protoplasts using a GFP-tagged pectin methyltransferase inhibitor protein and its mutant  
489 without a GPI-anchoring signal that the late transport pathways of these proteins are  
490 different (De Caroli et al., 2011). The DUF576 family methyltransferases that act  
491 against AGP glycan have been detected not only in the Golgi apparatus but also in  
492 small punctate structures that are distinct from the Golgi apparatus (Temple et al.,  
493 2019). Similarly, a subset of glycosyltransferases involved in AGP glycan biogenesis  
494 was found in a non-Golgi punctate structure with an exocyst protein Exo70 homolog 2,  
495 which is a marker for exocyst-positive organelles, but not with a SNARE protein  
496 SYP61, which is localized in the *trans*-Golgi network (TGN) and subsequent secretory  
497 vesicles (Poulsen et al., 2015). Recent analysis of the secretome of *Arabidopsis*  
498 indicated that there are at least two distinct secretory pathways in *Arabidopsis* leaf  
499 cells (Uemura et al., 2019). One of these pathways, which depends on SYP4-type  
500 SNAREs, is involved in the secretion of many hydrolases (Uemura et al., 2019). In an  
501 analysis focusing on AGP in the data generated and describe in this paper (PRIDE  
502 dataset identifier PXD009099 by H. Nakagami and co-workers), only a small fraction  
503 of AGPs with GPI-anchoring signal (18%) showed significantly high abundance in  
504 apoplasts in a wild-type relative to a mutant with SYP4-type SNARE proteins  
505 (Supplemental table 1). In contrast, when the same approach was taken against two  
506 groups of secretory hydrolases, namely, pectic-lyase like proteins without a  
507 GPI-anchoring signal and  $\beta$ -galactosidase, a greater proportion of these proteins  
508 showed a high level of secretion in the wild-type than the mutant SYP4-type SNARE  
509 proteins (35% and 38%, respectively). In *Arabidopsis*, the SYP4-type SNAREs are  
510 localized in not only TGN adjusting the Golgi apparatus but also a small punctate



511 structure that is called the Golgi-independent TGN or free TGN (Viotti et al., 2010;  
512 Kang et al., 2011; Uemura et al., 2014). A similar structure called a secretory vesicle  
513 cluster (SVC), which is involved in pectin secretion, is found in tobacco BY-2 cells  
514 (Toyooka et al., 2009). Analysis of the proteome and glycome of secretory vesicles  
515 marked with SYP61 indicated that these secretory vesicles are rich in the SYP4-type  
516 SNARE proteins as well as glycans that are recognized by mABs against pectin  
517 (Drakakaki et al., 2012; Wilkop et al., 2019). Although glycans in the same vesicle  
518 fraction are also recognized by mABs against AGP, this recognition is weaker than that  
519 in the cell wall fraction, in contrast to the recognition by mABs that recognize pectin  
520 (Fig. 3 in Wilkop et al., 2019). Collectively, these observations suggest that the  
521 GPI-anchored AGP precursor is predominantly transported from TGN to an  
522 exocyst-positive organelle, where a subset of glycosyltransferases and/or  
523 methyltransferases localize, and then is transported to the PM after efficient  
524 modification of the glycan in the compartment. The absence of a GPI-anchor in the  
525 AGP precursor prevents to take this route from TGN and passes through the default  
526 secretion pathway, and this mis-sorting limits the final maturation of AGP glycan.

527 Another possible explanation for the difference in glycan structure is that the  
528 accessibility to the modification enzymes might not be efficient in the absence of a  
529 GPI-anchor. Because most of the glycosyltransferases and methyltransferases in the  
530 secretory pathway are integral membrane proteins whose catalytic domains are located  
531 proximately to the phospholipid bilayer, the GPI-anchoring of the AGP precursor will  
532 bring the protein close to the catalytic sites of these enzymes. Without a GPI-anchor,  
533 such access would not be efficient, and this characteristic would prevent efficient  
534 maturation of the glycan side chain. The third possibility is that the transport speed is  
535 different between SPO-AGP and SPO-AGP $\Delta$ C, and this difference contributes to the  
536 difference in the glycan side chain. Future studies to address the pathways and kinetics  
537 of transport and modification of AGP using SPO-AGP as a model will reveal which  
538 scenario or combination of scenarios is most likely.

539

## 540 **Conclusion**

541 The fusion protein of GFP or SPO and NtAGP1 expressed in BY-2 cells migrated as a  
542 large smear on SDS-polyacrylamide gel and localized to the plasma membrane as a  
543 GPI-anchored form. In contrast, the expression of mutants without a GPI-anchoring  
544 signal yielded several forms, and the largest forms with large smears were secreted into  
545 the culture medium, whereas other forms were recovered in the endomembrane  
546 organelles. Comparison of the glycan structure of SPO-AGP recovered in microsomes

547 and secreted mutant SPO-AGP without a GPI-anchoring signal using antibodies  
548 against AGP glycan epitopes indicated that the glycan structures of these proteins are  
549 different. Therefore, the GPI-anchoring signal is required for both the proper transport  
550 and proper glycosylation of the AGP precursor.

551

552

## 553 **Materials and Methods**

### 554 *Construction of plasmid*

555 The pilot 5'-sequence of clones from the EST of tobacco BY-2 cells (Galis et al.,  
556 2006) allowed the identification of a clone (BY28237, GeneBank accession No.  
557 LC128049.1) encoding the NtAGP1 protein (GeneBank accession No. BAU61512),  
558 which is a typical AGP precursor nearly identical to a *Nicotiana alata* AGP precursor  
559 (Du et al., 1994). The signal peptide and GPI-anchoring signal were predicted using  
560 SignalP (<http://www.cbs.dtu.dk/services/SignalP-3.0/>) and PredGPI  
561 (<http://gpcr.biocomp.unibo.it/predgpi/>), respectively. Using this information and the  
562 PCR primers in Supplemental table 2, the expression constructs used in this study were  
563 generated. The fusion protein of GFP and NtAGP1, designated as GFP-AGP, was  
564 designed as follows. The signal peptide and two amino acids from the cleavage site of  
565 the signal peptide were linked to a mutant GFP (sGFP(S65T); Chiu et al., 1996), and  
566 then the C-terminus of this GFP was linked to the mature part and the GPI-anchoring  
567 signal of NtAGP1 by joining PCR. Using the EST as a template and primers P1 and P2,  
568 the coding region for the signal peptide and two amino acids with the N-terminal  
569 region of the GFP coding sequence was amplified. Using a sGFP(S65T)-containing  
570 plasmid (Shimizu et al., 2005) as a template and primers P3 and P4, a DNA fragment  
571 encoding part of a signal peptide, two amino acids of mature NtAGP1, GFP and the  
572 N-terminal part of mature NtAGP1 was amplified. Using the EST as a template and  
573 primers P5 and P6, a fragment encoding the C-terminal amino acids of GFP fused with  
574 the mature NtAGP1 and GPI-anchoring signal was amplified. After mixing these three  
575 fragments, the fusion construct was amplified using P1 and P6 primers. After digesting  
576 the resulting fragment with BglII and EcoRI restriction enzymes, because the primers  
577 also contain sequences for these enzymes, the fragment was cloned into the  
578 corresponding sites of plant expression vector pMAT137 (Yuasa et al., 2004). Using  
579 this plasmid as a template and primers P1 and P7, a fragment encoding GFP-AGP $\Delta$ C  
580 was amplified. The resulting fragment was digested with BglII and EcoRI and cloned  
581 into pMAT137 as described above.

582 For the construction of sporamin fusions, the coding sequence for the signal  
583 peptide and mature sporamin fusion construct ( $\Delta$ pro sporamin; Matsuoka and  
584 Nakamura, 1991) was used for the signal peptide-sporamin region. Using P8 and P9 as  
585 primers and a plasmid with the  $\Delta$ pro sporamin construct (pMAT108; Matsuoka and  
586 Nakamura, 1991) as a template, the region for signal peptide-sporamin with the  
587 N-terminal region of mature NtAGP1 was amplified. Using the GFP-AGP-expressing  
588 plasmid described above as a template and primers P10 and P11, a fragment encoding  
589 the C-terminal region of sporamin with mature AGP and a GPI-anchoring signal was  
590 amplified. After mixing these amplified fragments and primers P8 and P11, a fragment  
591 encoding the SPO-AGP fusion protein was amplified. The resulting fragment was  
592 digested with BglII and EcoRI and cloned into pMAT137 as described above. Using  
593 this plasmid as a template and primers P8 and P12, a fragment encoding SPO-AGP $\Delta$ C  
594 was amplified. The resulted fragment was digested with BglII and EcoRI and cloned  
595 into pMAT137 as described above.

596

#### 597 *Culture and transformation of tobacco BY-2 cells*

598 The plant expression plasmids generated for the expression of AGP fusion proteins  
599 were then used to transform tobacco BY-2 cells with *Agrobacterium* as described  
600 previously (Matsuoka and Nakamura, 1991). Cultures of tobacco BY-2 cells and their  
601 transformants were maintained as described previously (Matsuoka and Nakamura,  
602 1991). Seven-day-old cells (stationary phase) were used in all the experiments except  
603 when stated otherwise in the figure legends.

604

#### 605 *Confocal microscopy and image analysis*

606 The localizations of GFP-AGP and GFP-AGP $\Delta$ C expressed in transformed BY-2 cells  
607 were visualized using a Leica TCS SP8 confocal laser scanning microscope as  
608 described previously (Tasaki et al., 2014). In some cases, Z-stack images were  
609 collected and converted to a rotating movie. To visualize the plasma membrane using  
610 FM 4-64, cells were stained with FM 4-64 for 5 to 10 min as previously described for  
611 FM1-43 (Emans et al., 2002). Confocal images of the red fluorescence of stained cells  
612 were collected as described previously (Tasaki et al., 2014).

613

#### 614 *Antibodies*

615 A recombinant protein corresponding to the 14<sup>th</sup> to 165<sup>th</sup> positions of tobacco  
616 mitochondrial porin, encoded by the tobacco EST clone BY5432 (Gene Bank  
617 BP133193; Matsuoka et al., 2004) was expressed as a T7- and His<sub>6</sub>- tagged protein in

618 *E. coli* after subcloning the corresponding fragment into a pET23 expression vector.  
619 The recombinant protein was purified using the His<sub>6</sub>-tag and used as an antigen to  
620 immunize a Japanese white rabbit. Antiserum from this rabbit was then used as  
621 anti-mitochondrial porin. Antisera against SDS-denatured SPO (Matsuoka and  
622 Nakamura., 1991), affinity purified anti-plant Sec61 (Yuasa et al., 2005), anti V-PPase  
623 (Toyooka et al., 2009), anti-PIP (Suga et al., 2001), and anti-GLMT1 (Liu et al., 2015)  
624 antibodies were used at the appropriate dilutions. Monoclonal anti-AGP glycan  
625 antibodies, LM2 and LM6 (Yates et al., 1996), were purchased from PlantProbes. To  
626 visualize the antigen-antibody complex by immunoblotting, Alexa Flour 568 goat  
627 anti-rabbit IgG (H+L), Alexa Flour 568 goat anti-mouse IgG (H+L), Alexa flour 647  
628 goat anti-rat IgG (H+L) or Alexa Flour 647 goat anti-rat IgM ( $\mu$  chain) was purchased  
629 from Invitrogen (Eugene, OR) and used as a secondary antibody.

630

#### 631 *SDS-PAGE and detection of fusion proteins*

632 To estimate the size and extent of modification of the fluorescent fusion proteins, the  
633 proteins were separated by SDS-PAGE, and their fluorescence was recorded by direct  
634 scanning of the gel using a Typhoon 9600 image analyzer (GE Healthcare Bio-Science,  
635 Chicago, IL) as described previously (Tasaki et al., 2014). For the detection of SPO  
636 fusion proteins and AGP glycan, immunoblotting was carried out as described  
637 previously (Oda et al., 2020) using an appropriate primary and fluorescence-tagged  
638 secondary antibodies.

639 For the comparison of the reactivities of SPO-AGP and secreted SPO-AGP $\Delta$ C  
640 against anti-glycan antibodies, Adjustment of the loading of SPO-AGP in the  
641 microsomes and secreted large form of SPO-AGP $\Delta$ C was carried out after  
642 semi-quantitative immunoblotting using various amounts of microsomes from  
643 SPO-AGP-expressing cells and medium from SPO-AGP $\Delta$ C culture. Thereafter the  
644 volumes of the microsomes and the medium that gave nearly identical intensity when  
645 detected using an anti-sporamin antibody were determined.

646

#### 647 *Immunoprecipitation*

648 Immobilized anti-native sporamin was prepared as described previously (Matsuoka et  
649 al., 1995). Immunoprecipitation was performed essentially as described by Matsuoka  
650 and Nakamura (1991), except that the immobilized antibody was used instead of the  
651 anti-sporamin serum and protein A Sepharose.

652

#### 653 *Subcellular fractionation by differential centrifugation*

654 Cells and media were separated from the suspension culture by filtration. A 10 g  
655 aliquot of the cells was mixed with 10 mL of buffer containing 0.45 M sucrose, 50 mM  
656 Tris-MES (pH 7.3), 2 mM DTT, 1(w/v)% Na-ascorbate, and a piece of cOmplete Mini  
657 EDTA-free (Roche, Basel, Switzerland), and disrupted by high-pressure N<sub>2</sub> using a  
658 Parr Cell Disruption Bomb MODEL4636 (Parr Instrument, Moline, IL) under 500 psi  
659 for 20 min. The disrupted suspension was centrifuged at 1,000 g for 10 min at 4°C and  
660 the supernatant was used as a total cellular fraction. For the differential centrifugation  
661 study, the supernatant was centrifuged at 10,000g for 10 min at 4°C. Next, the  
662 supernatant was centrifuged at 100,000g for 1 h at 4°C, then collected and  
663 supplemented with 1 x TBS up to 1 mL as a soluble fraction. The precipitates after the  
664 1,000g, 10,000g and 100,000g centrifugations were resuspended with an equal volume  
665 of sonication buffer containing 1 x TBS (25 mM Tris-HCl (pH 7.4), 0.15 M NaCl), 1  
666 mM EDTA, 1% Na-ascorbate, 100 µM Leupeptin, 1 mM PMSF / 0.5% isopropanol  
667 and 1 mM NEM and sonicated using a Bioruptor (COSMO BIO, Tokyo); the  
668 sonication condition consisted of power M at intervals of 0.5 min for 8 min. These  
669 sonicated suspensions were filled with 1 x TBS to a final volume of 1 mL and used as  
670 the P1, P10 and P100 fractions, respectively. These fractions were used for  
671 immunoprecipitation and analyzed by immunoblotting.

672

673 *Preparation of microsomal fractions and fractionation using sucrose density gradient*  
674 *centrifugation*

675 The preparation of microsomal fractions and fractionation of microsomes using linear  
676 sucrose density gradient centrifugation was performed essentially as described by  
677 Matsuoka et al. (1997), except that a Beckman SW28.1 rotor was used. The continuous  
678 gradient was centrifuged at 100,000 g for 18 h at 4°C. After centrifugation, 1 mL  
679 fractions were collected from the bottom to the top of the gradient.

680

681 *Preparation of the protoplasts, vacuoplasts and cytoplasts*

682 Protoplasts were prepared from transformed BY-2 cells as described by Nagata et al.  
683 (1981). Vacuoplasts and cytoplasts were prepared from protoplasts as described by  
684 Sonobe (1990).

685

686 *Fractionation of GPI-anchored proteins by two-phase separation using Triton X-114*

687 Precondensation of Triton X-114 and the fractionation of GPI-anchored proteins were  
688 performed as described by Murata et al. (2012) with the following modifications. One  
689 hundred microliters of the microsomal fraction was gently mixed with 380 µL of 1 x

690 TBS and 120  $\mu$ L of ice-chilled precondensed Triton X-114, and incubated at 4°C  
691 overnight. The sample was centrifuged at 17,360g for 25 min at 4°C to remove  
692 detergent-insoluble materials. The supernatant was incubated at 37°C for 1.5 h and  
693 centrifuged at 13,000g for 5 min at room temperature to induce phase separation. The  
694 upper phase (aqueous phase) and the lower phase were collected. The lower phase was  
695 gently mixed with 400  $\mu$ L of chilled 1 x TBS, then the phase separation procedure was  
696 repeated and the upper phase in this second-round separation was combined with the  
697 first upper phase and used as an aqueous phase fraction. The resulting detergent-rich  
698 phase was mixed with a 4-fold volume of ice-cold acetone and incubated at -20°C  
699 overnight. The proteins were recovered by centrifugation at 13,000g for 30 min at 4°C  
700 and the precipitate was collected and air-dried on ice. The precipitate was resuspended  
701 with 400  $\mu$ L of 25 mM Tris-HCl (pH 7.4) and used as the det fraction. In some cases,  
702 6.5 m units of PI-PLC (phospholipase C, phosphatidylinositol-specific from *Bacillus*  
703 *cereus*) (Sigma Aldrich, St. Louis, MO) were included during the incubation. For the  
704 processing of SPO-AGP, 200  $\mu$ L of the det fraction was incubated with 1.8 m units of  
705 phospholipase C at 37°C for 2 h, and thereafter the two-phase separation with Triton  
706 X-114 was conducted.

707

#### 708 *Enzymes and protein assays*

709  $\alpha$ -mannosidase activity was measured as described previously (Boller and Kende,  
710 1979) using *p*-nitrophenyl phosphate as a substrate. Protein levels were measured using  
711 a DC protein assay kit (Bio-Rad).

712

#### 713 *Accession number*

714 NtAGP1 cDNA sequence: LC128049.

715

716

#### 717 **Acknowledgments**

718 We thank Dr. Koji Yuasa in RIKEN Plant Science Center for the production of  
719 recombinant mitochondrial porin and Mr. Nweke A. Boniface for improving the  
720 manuscript.

721

722

#### 723 **Literature Cited**



- 724
- 725 Abiodun MO, Matsuoka K (2013) Evidence that proliferation of Golgi apparatus  
726 depends on both de novo generation from the endoplasmic reticulum and  
727 formation from pre-existing stacks during the growth of tobacco BY-2 cells.  
728 *Plant Cell Physiol* 54: 541-554
- 729 Basu D, Liang Y, Liu X, Himmeldirk K, Faik A, Kieliszewski M, Held M, Showalter  
730 AM (2013) Functional identification of a  
731 hydroxyproline-O-galactosyltransferase specific for arabinogalactan protein  
732 biosynthesis in *Arabidopsis*. *J Biol Chem* 288: 10132-10143
- 733 Basu D, Wang W, Ma S, DeBrosse T, Poirier E, Emch K, Soukup E, Tian L, Showalter  
734 AM (2015) Two hydroxyproline galactosyltransferases, GALT5 and GALT2,  
735 function in arabinogalactan-protein glycosylation, growth and development in  
736 *Arabidopsis*. *PLoS One* 10: e0125624
- 737 Boller T, Kende H (1979) Hydrolytic enzymes in the central vacuole of plant cells.  
738 *Plant Physiol* 63: 1123-1132
- 739 Bordier C (1981) Phase separation of integral membrane proteins in Triton X-114  
740 solution. *J Biol Chem* 256: 1604-1607
- 741 Chiu W, Niwa Y, Zeng W, Hirano T, Kobayashi H, Sheen J (1996) Engineered GFP as  
742 a vital reporter in plants. *Curr Biol* 6: 325-330
- 743 De Caroli M, Lenucci MS, Di Sansebastiano GP, Dalessandro G, De Lorenzo G, Piro G  
744 (2011) Protein trafficking to the cell wall occurs through mechanisms  
745 distinguishable from default sorting in tobacco. *Plant J* 65: 295-308
- 746 Dilokpimol A, Poulsen CP, Vereb G, Kaneko S, Schulz A, Geshi N (2014)  
747 Galactosyltransferases from *Arabidopsis thaliana* in the biosynthesis of type II  
748 arabinogalactan: molecular interaction enhances enzyme activity. *BMC Plant*  
749 *Biol* 14: 90
- 750 Drakakaki G, van de Ven W, Pan S, Miao Y, Wang J, Keinath NF, Weatherly B, Jiang  
751 L, Schumacher K, Hicks G, Raikhel N (2012) Isolation and proteomic analysis  
752 of the SYP61 compartment reveal its role in exocytic trafficking in *Arabidopsis*.  
753 *Cell Res* 22: 413-424
- 754 Du H, Simpson RJ, Moritz RL, Clarke AE, Bacic A (1994) Isolation of the protein  
755 backbone of an arabinogalactan-protein from the styles of *Nicotiana glauca* and  
756 characterization of a corresponding cDNA. *Plant Cell* 6: 1643-1653
- 757 Emans N, Zimmermann S, Fischer R (2002) Uptake of a fluorescent marker in plant  
758 cells is sensitive to brefeldin A and wortmannin. *Plant Cell* 14: 71-86



- 759 Gális I, Simek P, Narisawa T, Sasaki M, Horiguchi T, Fukuda H, Matsuoka K (2006) A  
760 novel R2R3 MYB transcription factor NtMYBJS1 is a methyl  
761 jasmonate-dependent regulator of phenylpropanoid-conjugate biosynthesis in  
762 tobacco. *Plant J* 46: 573-592
- 763 Habuchi S, Tsutsui H, Kochaniak AB, Miyawaki A, van Oijen AM (2008) mKikGR, a  
764 monomeric photoswitchable fluorescent protein. *PLoS One* 3: e3944
- 765 Hong E, Davidson AR, Kaiser CA (1996) A pathway for targeting soluble misfolded  
766 proteins to the yeast vacuole. *J Cell Biol* 135: 623-633
- 767 Hooper NM (2001) Determination of glycosyl-phosphatidylinositol membrane protein  
768 anchorage. *Proteomics* 1: 748-755
- 769 Kang BH, Nielsen E, Preuss ML, Mastrorarde D, Staehelin LA (2011) Electron  
770 tomography of RabA4b- and PI-4K $\beta$ 1-labeled *trans* Golgi network  
771 compartments in Arabidopsis. *Traffic* 12: 313-329
- 772 Knoch E, Dilokpimol A, Tryfona T, Poulsen CP, Xiong G, Harholt J, Petersen BL,  
773 Ulvskov P, Hadi MZ, Kotake T, Tsumuraya Y, Pauly M, Dupree P, Geshi N  
774 (2013) A  $\beta$ -glucuronosyltransferase from Arabidopsis thaliana involved in  
775 biosynthesis of type II arabinogalactan has a role in cell elongation during  
776 seedling growth. *Plant J* 76: 1016-1029
- 777 Lind JL, Bacic A, Clarke AE, Anderson MA (1994) A style-specific  
778 hydroxyproline-rich glycoprotein with properties of both extensins and  
779 arabinogalactan proteins. *Plant J* 6: 491-502
- 780 Liu J, Hayashi K, Matsuoka K (2015) Membrane topology of Golgi-localized probable  
781 S-adenosylmethionine-dependent methyltransferase in tobacco (*Nicotiana*  
782 *tabacum*) BY-2 cells. *Biosci Biotechnol Biochem* 79: 2007-2013
- 783 Liu YS, Fujita M (2020) Mammalian GPI-anchor modifications and the enzymes  
784 involved. *Biochem Soc Trans* 48: 1129-1138
- 785 Matsuoka K, Demura T, Galis I, Horiguchi T, Sasaki M, Tashiro G, Fukuda H (2004) A  
786 comprehensive gene expression analysis toward the understanding of growth  
787 and differentiation of tobacco BY-2 cells. *Plant and Cell Physiology* 45:  
788 1280-1289
- 789 Matsuoka K, Higuchi T, Maeshima M, Nakamura K (1997) A Vacuolar-Type  
790 H<sup>+</sup>-ATPase in a nonvacuolar organelle is required for the sorting of soluble  
791 vacuolar protein precursors in tobacco cells. *Plant Cell* 9: 533-546
- 792 Matsuoka K, Nakamura K (1991) Propeptide of a precursor to a plant vacuolar protein  
793 required for vacuolar targeting. *Proc Natl Acad Sci U S A* 88: 834-838

- 794 Matsuoka K, Nakamura K (1999) Large alkyl side-chains of isoleucine and leucine in  
795 the NPIRL region constitute the core of the vacuolar sorting determinant of  
796 sporamin precursor. *Plant Mol Biol* 41: 825-835
- 797 Matsuoka K, Watanabe N, Nakamura K (1995) O-glycosylation of a precursor to a  
798 sweet potato vacuolar protein, sporamin, expressed in tobacco cells. *Plant*  
799 *Journal* 8: 877-889
- 800 Maurer JB, Bacic A, Pereira-Netto AB, Donatti L, Zawadzki-Baggio SF, Pettolino FA  
801 (2010) Arabinogalactan-proteins from cell suspension cultures of *Araucaria*  
802 *angustifolia*. *Phytochemistry* 71: 1400-1409
- 803 Murata D, Nomura KH, Dejima K, Mizuguchi S, Kawasaki N, Matsuishi-Nakajima Y,  
804 Ito S, Gengyo-Ando K, Kage-Nakadai E, Mitani S, Nomura K (2012)  
805 GPI-anchor synthesis is indispensable for the germline development of the  
806 nematode *Caenorhabditis elegans*. *Mol Biol Cell* 23: 982-995
- 807 Nagata T, Okada K, Takebe I, Matsui C (1981) Delivery of tobacco mosaic virus RNA  
808 into plant protoplasts mediated by reverse-phase evaporation vesicles  
809 (liposomes). *Molecular & General Genetics* 184: 161-165
- 810 Norman P, Wingate V, Fitter M, Lamb C (1986) Monoclonal-antibodies to plant  
811 plasma-membrane antigens. *Planta* 167: 452-459
- 812 Oda Y, Asatsuma S, Nakasone H, Matsuoka K (2020) Sucrose starvation induces the  
813 degradation of proteins in trans-Golgi network and secretory vesicle cluster in  
814 tobacco BY-2 cells. *Bioscience Biotechnology and Biochemistry* 84: 1652-1666
- 815 Ogawa-Ohnishi M, Matsubayashi Y (2015) Identification of three potent  
816 hydroxyproline O-galactosyltransferases in *Arabidopsis*. *Plant J* 81: 736-746
- 817 Oka T, Saito F, Shimma Y, Yoko-o T, Nomura Y, Matsuoka K, Jigami Y (2010)  
818 Characterization of endoplasmic reticulum-localized UDP-D-galactose:  
819 hydroxyproline O-galactosyltransferase using synthetic peptide substrates in  
820 *Arabidopsis*. *Plant Physiol* 152: 332-340
- 821 Paris N, Rogers SW, Jiang L, Kirsch T, Beevers L, Phillips TE, Rogers JC (1997)  
822 Molecular cloning and further characterization of a probable plant vacuolar  
823 sorting receptor. *Plant Physiol* 115: 29-39
- 824 Parsons HT, Stevens TJ, McFarlane HE, Vidal-Melgosa S, Griss J, Lawrence N, Butler  
825 R, Sousa MML, Salemi M, Willats WGT, Petzold CJ, Heazlewood JL, Lilley  
826 KS (2019) Separating Golgi proteins from *cis* to *trans* reveals underlying  
827 properties of cisternal localization. *Plant Cell* 31: 2010-2034
- 828 Pereira AM, Pereira LG, Coimbra S (2015) Arabinogalactan proteins: rising attention  
829 from plant biologists. *Plant Reprod* 28: 1-15

- 830 Poulsen CP, Dilokpimol A, Geshi N (2015) Arabinogalactan biosynthesis: Implication  
831 of AtGALT29A enzyme activity regulated by phosphorylation and co-localized  
832 enzymes for nucleotide sugar metabolism in the compartments outside of the  
833 Golgi apparatus. *Plant Signal Behav* 10: e984524
- 834 Poulsen CP, Dilokpimol A, Mouille G, Burow M, Geshi N (2014) Arabinogalactan  
835 glycosyltransferases target to a unique subcellular compartment that may  
836 function in unconventional secretion in plants. *Traffic* 15: 1219-1234
- 837 Putoczki TL, Pettolino F, Griffin MD, Möller R, Gerrard JA, Bacic A, Jackson SL  
838 (2007) Characterization of the structure, expression and function of *Pinus radiata*  
839 *D. Don* arabinogalactan-proteins. *Planta* 226: 1131-1142
- 840 Sonobe S (1990) Cytochalasin B cytokinetic cleavage in miniprotoplast isolated from  
841 cultured tobacco cells. *Protoplasma* 155: 239-242
- 842 Shimizu M, Igasaki T, Yamada M, Yuasa K, Hasegawa J, Kato T, Tsukagoshi H,  
843 Nakamura K, Fukuda H, Matsuoka K (2005) Experimental determination of  
844 proline hydroxylation and hydroxyproline arabinogalactosylation motifs in  
845 secretory proteins. *Plant J* 42: 877-889
- 846 Showalter AM, Basu D (2016) Extensin and arabinogalactan-protein biosynthesis:  
847 Glycosyltransferases, research challenges, and biosensors. *Front Plant Sci* 7: 814
- 848 Showalter AM, Keppler B, Lichtenberg J, Gu D, Welch LR (2010) A bioinformatics  
849 approach to the identification, classification, and analysis of hydroxyproline-rich  
850 glycoproteins. *Plant Physiol* 153: 485-513
- 851 Singh H, Ansari HR, Raghava GP (2013) Improved method for linear B-cell epitope  
852 prediction using antigen's primary sequence. *PLoS One* 8: e62216
- 853 Steffan W, Kováčč P, Albersheim P, Darvill A, Hahn M (1995) Characterization of a  
854 monoclonal antibody that recognizes an arabinosylated (1- $\beta$ )-D-galactan  
855 epitope in plant complex carbohydrates. *Carbohydrate Research* 275: 295-307
- 856 Suga S, Imagawa S, Maeshima M (2001) Specificity of the accumulation of mRNAs  
857 and proteins of the plasma membrane and tonoplast aquaporins in radish organs.  
858 *Planta* 212: 294-304
- 859 Tan L, Qiu F, Lamport DT, Kieliszewski MJ (2004) Structure of a hydroxyproline  
860 (Hyp)-arabinogalactan polysaccharide from repetitive Ala-Hyp expressed in  
861 transgenic *Nicotiana tabacum*. *J Biol Chem* 279: 13156-13165
- 862 Tan L, Varnai P, Lamport DT, Yuan C, Xu J, Qiu F, Kieliszewski MJ (2010) Plant  
863 O-hydroxyproline arabinogalactans are composed of repeating trigalactosyl  
864 subunits with short bifurcated side chains. *J Biol Chem* 285: 24575-24583

- 865 Tasaki M, Asatsuma S, Matsuoka K (2014) Monitoring protein turnover during  
866 phosphate starvation-dependent autophagic degradation using a  
867 photoconvertible fluorescent protein aggregate in tobacco BY-2 cells. *Front*  
868 *Plant Sci* 5: 172
- 869 Temple H, Mortimer JC, Tryfona T, Yu X, Lopez-Hernandez F, Sorieul M, Anders N,  
870 Dupree P (2019) Two members of the DUF579 family are responsible for  
871 arabinogalactan methylation in Arabidopsis. *Plant Direct* 3: e00117
- 872 Toyooka K, Goto Y, Asatsuma S, Koizumi M, Mitsui T, Matsuoka K (2009) A mobile  
873 secretory vesicle cluster involved in mass transport from the Golgi to the plant  
874 cell exterior. *Plant Cell* 21: 1212-1229
- 875 Tryfona T, Liang HC, Kotake T, Tsumuraya Y, Stephens E, Dupree P (2012) Structural  
876 characterization of Arabidopsis leaf arabinogalactan polysaccharides. *Plant*  
877 *Physiol* 160: 653-666
- 878 Uemura T, Nakano RT, Takagi J, Wang Y, Kramer K, Finkemeier I, Nakagami H,  
879 Tsuda K, Ueda T, Schulze-Lefert P, Nakano A (2019) A Golgi-released  
880 subpopulation of the *trans*-Golgi network mediates protein secretion in  
881 Arabidopsis. *Plant Physiol* 179: 519-532
- 882 Uemura T, Suda Y, Ueda T, Nakano A (2014) Dynamic behavior of the *trans*-golgi  
883 network in root tissues of Arabidopsis revealed by super-resolution live imaging.  
884 *Plant Cell Physiol* 55: 694-703
- 885 VandenBosch K, Bradley D, Knox J, Perotto S, Butcher G, Brewin N (1989) Common  
886 components of the infection thread matrix and the intercellular space identified  
887 by immunocytochemical analysis of pea nodules and uninfected roots. *EMBO*  
888 *Journal* 8: 335-341
- 889 Velasquez SM, Ricardi MM, Poulsen CP, Oikawa A, Dilokpimol A, Halim A, Mangano  
890 S, Denita Juarez SP, Marzol E, Salgado Salter JD, Dorosz JG, Borassi C, Möller  
891 SR, Buono R, Ohsawa Y, Matsuoka K, Otegui MS, Scheller HV, Geshi N,  
892 Petersen BL, Iusem ND, Estevez JM (2015) Complex regulation of  
893 prolyl-4-hydroxylases impacts root hair expansion. *Mol Plant* 8: 734-746
- 894 Viotti C, Bubeck J, Stierhof YD, Krebs M, Langhans M, van den Berg W, van Dongen  
895 W, Richter S, Geldner N, Takano J, Jürgens G, de Vries SC, Robinson DG,  
896 Schumacher K (2010) Endocytic and secretory traffic in Arabidopsis merge in  
897 the *trans*-Golgi network/early endosome, an independent and highly dynamic  
898 organelle. *Plant Cell* 22: 1344-1357
- 899 Wilkop T, Pattathil S, Ren G, Davis DJ, Bao W, Duan D, Peralta AG, Domozych DS,  
900 Hahn MG, Drakakaki G (2019) A hybrid approach enabling large-scale

901 glycomic analysis of post-Golgi vesicles reveals a transport route for  
902 polysaccharides. *Plant Cell* 31: 627-644  
903 Xu J, Tan L, Lamport DT, Showalter AM, Kieliszewski MJ (2008) The O-Hyp  
904 glycosylation code in tobacco and *Arabidopsis* and a proposed role of  
905 Hyp-glycans in secretion. *Phytochemistry* 69: 1631-1640  
906 Yamauchi N, Gosho T, Asatuma S, Toyooka K, Fujiwara T, Matsuoka K (2013)  
907 Polarized localization and borate-dependent degradation of the *Arabidopsis*  
908 borate transporter BOR1 in tobacco BY-2 cells. *F1000Res* 2: 185  
909 Yates EA, Valdor JF, Haslam SM, Morris HR, Dell A, Mackie W, Knox JP (1996)  
910 Characterization of carbohydrate structural features recognized by  
911 anti-arabinogalactan-protein monoclonal antibodies. *Glycobiology* 6: 131-139  
912 Yeats TH, Bacic A, Johnson KL (2018) Plant glycosylphosphatidylinositol anchored  
913 proteins at the plasma membrane-cell wall nexus. *J Integr Plant Biol* 60:  
914 649-669  
915 Yuasa K, Toyooka K, Fukuda H, Matsuoka K (2005) Membrane-anchored prolyl  
916 hydroxylase with an export signal from the endoplasmic reticulum. *Plant J* 41:  
917 81-94

918  
919  
920

## 921 **Legends to figures**

922 **Figure 1.** Expression of the GFP-AGP fusion and its mutant without a GPI-anchoring  
923 signal in tobacco BY-2 cells. **A:** Schematic representation of the GFP fusion constructs.  
924 **B:** Accumulation of GFP fusion proteins in the culture of transformed tobacco cells.  
925 Total cell lysates were prepared from cells from 3-day-old and 7-day-old cultures, then  
926 separated by SDS-PAGE, and the GFP fluorescence in the gel was recorded. Each  
927 lane contained 3.6  $\mu$ g of protein. **C:** Fractionation of 7-day-old cultures and  
928 distribution of the GFP-fusion proteins. Each lane contained proteins corresponding to  
929 40  $\mu$ L of cell culture. M, medium fraction; CW, cell wall fraction; Me, membrane  
930 fraction from total cell lysate; So, soluble fraction from total cell lysate.

931

932 **Figure 2.** Confocal localization study of GFP-AGP and GFP-AGP $\Delta$ C in transformed  
933 tobacco BY-2 cells. **A:** Confocal image of 7-day-old transformed tobacco cells  
934 expressing GFP-AGP. **B:** Corresponding DIC image of cells in A. **C:** Confocal image  
935 of 7-day-old transformed tobacco cells expressing GFP-AGP $\Delta$ C. **D:** Corresponding  
936 DIC image of cells in C. **E:** Confocal image of 7-day-old non-transformed cells. **F:**

937 Corresponding DIC image of cells in E. An identical condition was used to collect  
938 fluorescence images in A, C, and E. **G:** Confocal image of 7-day-old transformed  
939 tobacco cells expressing GFP-AGP after plasmolysis. **H–J:** Confocal image of  
940 7-day-old transformed tobacco cells expressing GFP-AGP after staining with FM4-64.  
941 **H:** GFP fluorescence. **I:** FM4-64 fluorescence. **J:** merged image of H and I.

942

943 **Figure 3.** Expression, secretion and subcellular localization of the sporamin-AGP  
944 fusion protein and its mutant lacking a GPI-anchoring signal in tobacco BY-2 cells. **A:**  
945 Schematic representation of the sporamin fusion constructs. **B:** Expression and  
946 secretion of SPO-AGP and SPO-AGP $\Delta$ C. 7-day-old cultures (Cu) of transformed  
947 BY-2 cells expressing SPO-AGP and SPO-AGP $\Delta$ C and non-transformed BY-2 cells  
948 (WT) were separated into cells (C) and medium (M). The proteins in these fractions,  
949 corresponding to 10  $\mu$ L of cell culture, were separated by SDS-PAGE, and  
950 sporamin-related polypeptides were detected by using an anti-SDS-denatured sporamin  
951 antibody. Closed arrowheads indicate transgene-dependent polypeptides. **C:** Detection  
952 of sporamin-related polypeptides after immunoprecipitation. Sporamin-related  
953 polypeptides were recovered by immunoprecipitation using immobilized anti-native  
954 sporamin, and the recovered proteins were analyzed by immunoblotting as described in  
955 the Materials and Methods section. Each lane contained sporamin-related polypeptides  
956 from a 0.5 ml, 7-day-old culture. Closed arrowheads indicate the migration position of  
957 transgene-dependent polypeptides detected in B. Open arrowheads indicate the  
958 calculated migration position of non-glycosylated polypeptides. **D:** Subcellular  
959 fractionation study of SPO-AGP-expressing cells. Fractionation of cells was carried  
960 out by differential centrifugation as described in the Materials and Methods section,  
961 and sporamin-related polypeptides in the fractions were recovered by  
962 immunoprecipitation, separated by SDS-PAGE, and detected by immunoblotting. P1,  
963 the 1,000g precipitate containing cell walls and unbroken cells; P10, the 10,000g  
964 precipitate containing most of the mitochondria; P100, the 100,000g precipitate  
965 containing microsomes; S, the 100,000g supernatant containing soluble proteins in the  
966 cytoplasm, vacuoles and periplasmic space. **E:** Subcellular fractionation study of  
967 SPO-AGP $\Delta$ C-expressing cells. Subcellular fractionation and detection of  
968 sporamin-related polypeptides were carried out as in D.

969

970 **Figure 4.** Distribution of SPO-AGP within endomembrane organelles. Microsomes  
971 were prepared from SPO-AGP-expressing cells in the presence of Mg<sup>2+</sup> (A) or EDTA  
972 (B) and subjected to isopycnic sucrose density gradient ultracentrifugation. The



973 resulting gradients were fractionated from the bottom into 17 fractions. The  
974 concentration of sucrose in the gradient is shown at the top. The distribution of marker  
975 proteins was analyzed by immunoblotting with specific antibodies: P-ATPase and PIP  
976 for PM, Sec61 for the ER, GLMT1 for Golgi, and V-PPase for the vacuolar membrane.  
977 The distribution of SPO-AGP, which migrated close to the top of the gel, was analyzed  
978 by immunoblotting using an antibody against sporamin. The middle panels show the  
979 relative distribution of SPO-AGP and marker proteins after quantification of the  
980 signals on blots. The bottom panels are the results of immunoblots.

981

982 **Figure 5.** Distribution of different forms of SPO-AGP $\Delta$ C in the cell. **A:** Distribution of  
983 different forms in cells and protoplasts. Protoplasts were prepared from  
984 SPO-AGP $\Delta$ C-expressing cells by digesting the cell walls as described in the Materials  
985 and Methods section. Proteins in cells and protoplasts were separated by SDS-PAGE  
986 and sporamin-related polypeptides were detected by immunoblotting. As a control,  
987 protoplasts were prepared from non-transformed cells (WT) and cross-reactive  
988 polypeptides against anti-sporamin were analyzed by immunoblotting. Each lane  
989 contained 25  $\mu$ g protein. Closed arrowheads indicate the migration position of the  
990 transgene-dependent polypeptides. Asterisk indicate a possible degradation product of  
991 sporamin that was occasionally observed on immunoblots. **B:** Small SPO-AGP $\Delta$ C was  
992 localized in the vacuoles. To assess the localization of the intermediate and small  
993 SPO-AGP $\Delta$ C proteins, protoplasts were separated into vacuoplasts and cytoplasts and  
994 the distribution of SPO-AGP $\Delta$ C proteins were analyzed by immunoblotting. An equal  
995 amount of the activity of  $\alpha$ -mannosidase, which is a vacuolar marker enzyme, was  
996 loaded in the vacuoplast and protoplast lanes, and nearly equal amounts of proteins  
997 were loaded into the protoplast and cytoplast lanes. As a fractionation control,  
998 mitochondrial porin was also detected by immunoblotting. **C,D:** Distribution of the  
999 intermediate SPO-AGP $\Delta$ C within endomembrane organelles. Microsomes were  
1000 prepared from SPO-AGP $\Delta$ C-expressing cells in the presence of Mg<sup>2+</sup> (C) or EDTA  
1001 (D), subjected to isopycnic sucrose density gradient ultracentrifugation, fractionated  
1002 and analyzed for the distribution of intermediate SPO-AGP $\Delta$ C and marker proteins as  
1003 described in the legend to Fig. 4.

1004

1005 **Figure 6.** Both GFP-AGP and SPO-AGP are GPI-anchored proteins. **A:** Triton X-114  
1006 two-phase partition assay of GFP-AGP, GFP-AGP $\Delta$ C and PIP-GFP. Microsomes from  
1007 GFP-AGP- or PIP-GFP-expressing cells, or the culture medium of  
1008 GFP-AGP $\Delta$ C-expressing cells was subjected to the two-phase separation assay as



1009 described in the Materials and Methods section. Proteins in these two phases were  
1010 separated by SDS-PAGE, and the fluorescence of GFP in the gel was recorded. Each  
1011 lane contained proteins corresponding to an equal amount of microsomes or medium.  
1012 aqu, aqueous phase; det, detergent phase. **B:** Triton X-114 two-phase partition assay of  
1013 SPO-AGP and SPO-AGP $\Delta$ C. Two-phase partition was carried out as in the legend to  
1014 A. Proteins were separated by SDS-PAGE and detected by immunoblotting using  
1015 anti-sporamin antibody. **C:** PI-PLC digestion of GFP-AGP. The two-phase partition  
1016 assay was carried out in the absence and presence of PI-PLC. **D:** Two-phase partition  
1017 assay of SPO-AGP. Microsomal proteins from SPO-AGP-expressing cells were  
1018 subjected to the second-round two-phase partition assay in the absence or presence of  
1019 PI-PLC. Both SPO-AGP and V-PPase, which is an integral membrane protein, were  
1020 detected by immunoblotting. Each lane in these figures contained proteins  
1021 corresponding to an equal amount of microsomes or medium.

1022

1023 **Figure 7.** The large form of SPO-AGP $\Delta$ C was specifically recognized by LM2  
1024 monoclonal antibody. **A:** Detection by anti-sporamin antibody to show that nearly  
1025 equal amount of sporamin-fusion proteins were loaded. **B:** Detection by the  
1026 monoclonal antibody LM2, which recognizes a glycan epitope with  $\beta$ -linked  
1027 glucuronic acid. **C:** Detection by the monoclonal antibody LM6, which recognizes a  
1028 glycan epitope consisting of (1-5)- $\alpha$ -L-arabinosyl residues. AGP, microsomes from  
1029 SPO-AGP-expressing cells;  $\Delta$ C, culture medium from SPO-AGP $\Delta$ C expressing  
1030 culture; WT, corresponding microsomes and medium from non-transformed BY-2  
1031 cells with an equal amount of proteins with either microsomes from SPO-AGP or  
1032 culture medium from SPO-AGP $\Delta$ C.

1033

1034

1035

1036

1037

1038

1039

1040

1041

1042

1043

1044

1045

1046

1047

1048

1049

1050

1051

1052 Legends to the Supplemental figure and movie.

1053

1054 Supplemental figure 1.

1055 Expression of the monomeric kikume green-red (mKikGR)-AGP fusion protein in

1056 tobacco BY-2 cells. Proteins were extracted from transformed tobacco BY-2 cells

1057 expressing either mKikGR-AGP, GFP or GFP-AGP and separated by SDS-PAGE.

1058 Then, the green fluorescence in the gel emitted from these proteins was recorded using

1059 a Typhoon 9600 image analyzer.

1060

1061 Supplemental movie 1.

1062 Three-dimensional construction of the distribution of GFP-AGP fluorescence in

1063 transformed tobacco BY-2 cells. Z-stack images of green fluorescence were collected

1064 and reconstituted to the 3-D image. The constructed image was rotated.

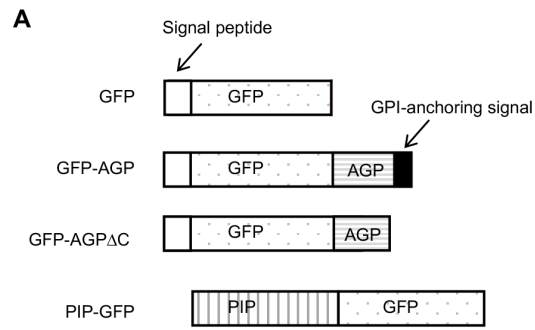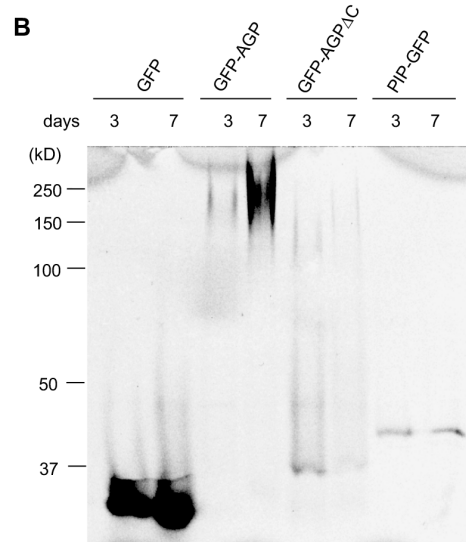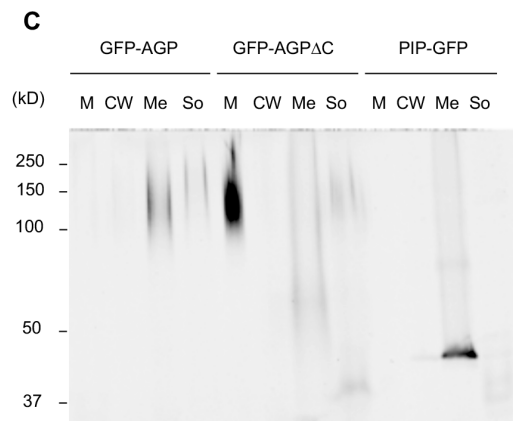

Figure 1. Expression of the GFP-AGP fusion and its mutant without a GPI-anchoring signal in tobacco BY-2 cells. **A:** Schematic representation of the GFP fusion constructs. **B:** Accumulation of GFP fusion proteins in the culture of transformed tobacco cells. Total cell lysates were prepared from cells from 3-day-old and 7-day-old cultures, then separated by SDS-PAGE, and the GFP fluorescence in the gel was recorded. Each lane contained 3.6  $\mu$ g of protein. **C:** Fractionation of 7-day-old cultures and distribution of the GFP-fusion proteins. Each lane contained proteins corresponding to 40  $\mu$ L of cell culture. M, medium fraction; CW, cell wall fraction; Me, membrane fraction from total cell lysate; So, soluble fraction from total cell lysate.

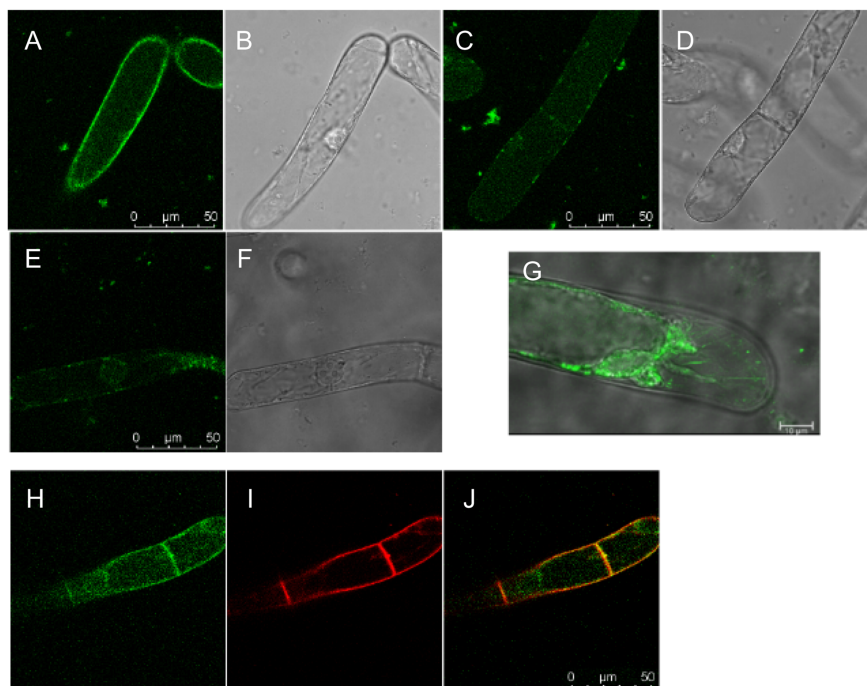

Figure 2. Confocal localization study of GFP-AGP and GFP-AGP $\Delta$ C in transformed tobacco BY-2 cells. A: Confocal image of 7-day-old transformed tobacco cells expressing GFP-AGP. B: Corresponding DIC image of cells in A. C: Confocal image of 7-day-old transformed tobacco cells expressing GFP-AGP $\Delta$ C. D: Corresponding DIC image of cells in C. E: Confocal image of 7-day-old non-transformed cells. F: Corresponding DIC image of cells in E. An identical condition was used to collect fluorescence images in A, C, and E. G: Confocal image of 7-day-old transformed tobacco cells expressing GFP-AGP after plasmolysis. H–J: Confocal image of 7-day-old transformed tobacco cells expressing GFP-AGP after staining with FM4-64. H: GFP fluorescence. I: FM4-64 fluorescence. J: merged image of H and I.

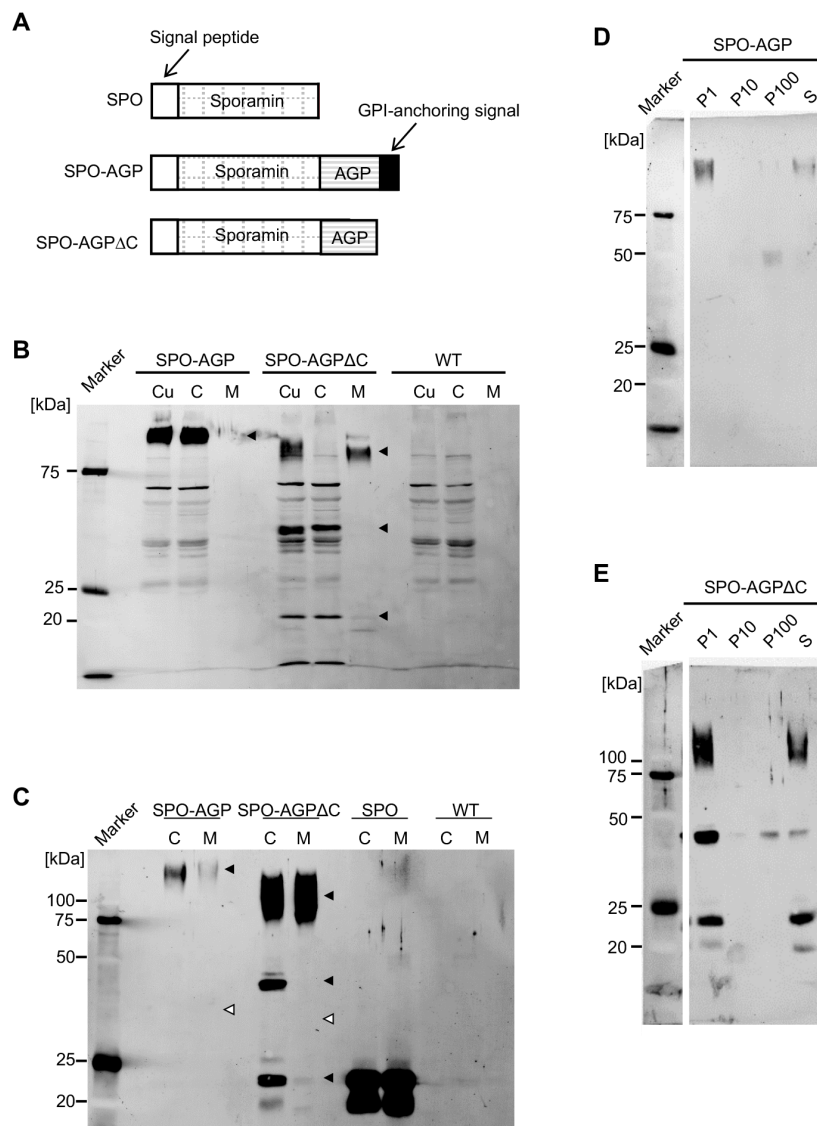

Figure 3. Expression, secretion and subcellular localization of the sporamin-AGP fusion protein and its mutant lacking a GPI-anchoring signal in tobacco BY-2 cells. A: Schematic representation of the sporamin fusion constructs. B: Expression and secretion of SPO-AGP and SPO-AGP $\Delta$ C. 7-day-old cultures (Cu) of transformed BY-2 cells expressing SPO-AGP and SPO-AGP $\Delta$ C and non-transformed BY-2 cells (WT) were separated into cells (C) and medium (M). The proteins in these fractions, corresponding to 10  $\mu$ L of cell culture, were separated by SDS-PAGE, and sporamin-related polypeptides were detected by using an anti-SDS-denatured sporamin antibody. Closed arrowheads indicate transgene-dependent polypeptides. C: Detection of sporamin-related polypeptides after immunoprecipitation. Sporamin-related polypeptides were recovered by immunoprecipitation using immobilized anti-native sporamin, and the recovered proteins were analyzed by immunoblotting as described in the Materials and Methods section. Each lane contained sporamin-related polypeptides from a 0.5 ml, 7-day-old culture. Closed arrowheads indicate the migration position of transgene-dependent polypeptides detected in B. Open arrowheads indicate the calculated migration position of non-glycosylated polypeptides. D: Subcellular fractionation study of SPO-AGP-expressing cells. Fractionation of cells was carried out by differential centrifugation as described in the Materials and Methods section, and sporamin-related polypeptides in the fractions were recovered by immunoprecipitation, separated by SDS-PAGE, and detected by immunoblotting. P1, the 1,000g precipitate containing cell walls and unbroken cells; P10, the 10,000g precipitate containing most of the mitochondria; P100, the 100,000g precipitate containing microsomes; S, the 100,000g supernatant containing soluble proteins in the cytoplasm, vacuoles and periplasmic space. E: Subcellular fractionation study of SPO-AGP $\Delta$ C-expressing cells. Subcellular fractionation and detection of sporamin-related polypeptides were carried out as in D.

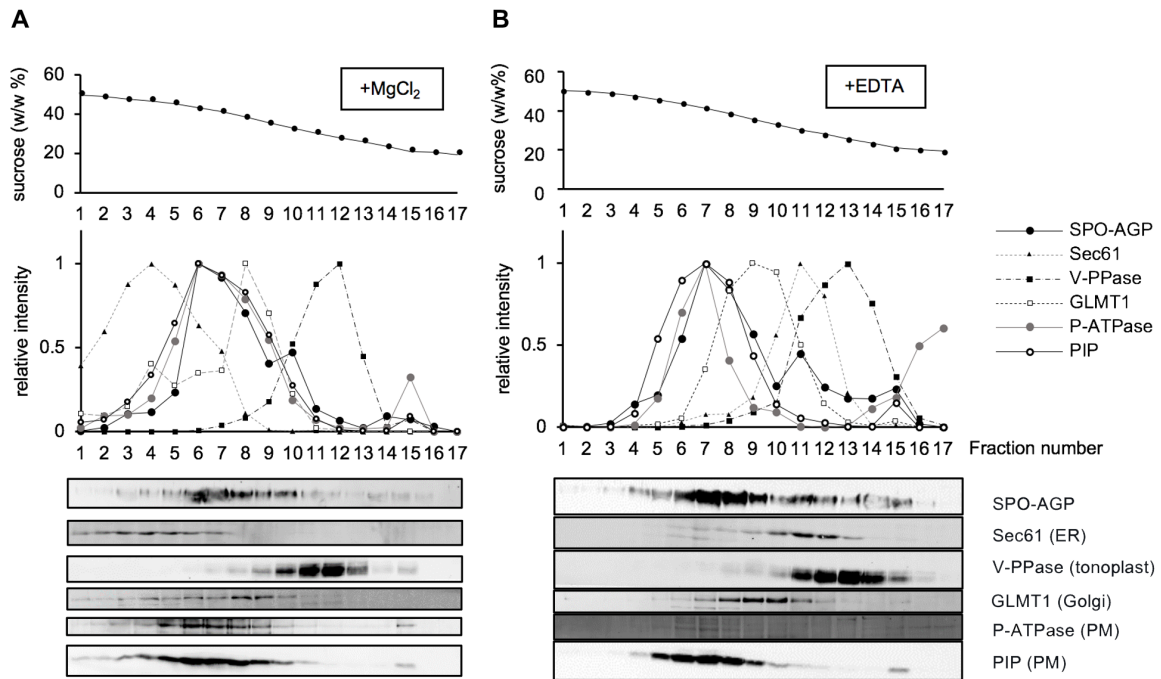

Figure 4. Distribution of SPO-AGP within endomembrane organelles. Microsomes were prepared from SPO-AGP-expressing cells in the presence of Mg<sup>2+</sup> (A) or EDTA (B) and subjected to isopycnic sucrose density gradient ultracentrifugation. The resulting gradients were fractionated from the bottom into 17 fractions. The concentration of sucrose in the gradient is shown at the top. The distribution of marker proteins was analyzed by immunoblotting with specific antibodies: P-ATPase and PIP for PM, Sec61 for the ER, GLMT1 for Golgi, and V-PPase for the vacuolar membrane. The distribution of SPO-AGP, which migrated close to the top of the gel, was analyzed by immunoblotting using an antibody against sporamin. The middle panels show the relative distribution of SPO-AGP and marker proteins after quantification of the signals on blots. The bottom panels are the results of immunoblots.

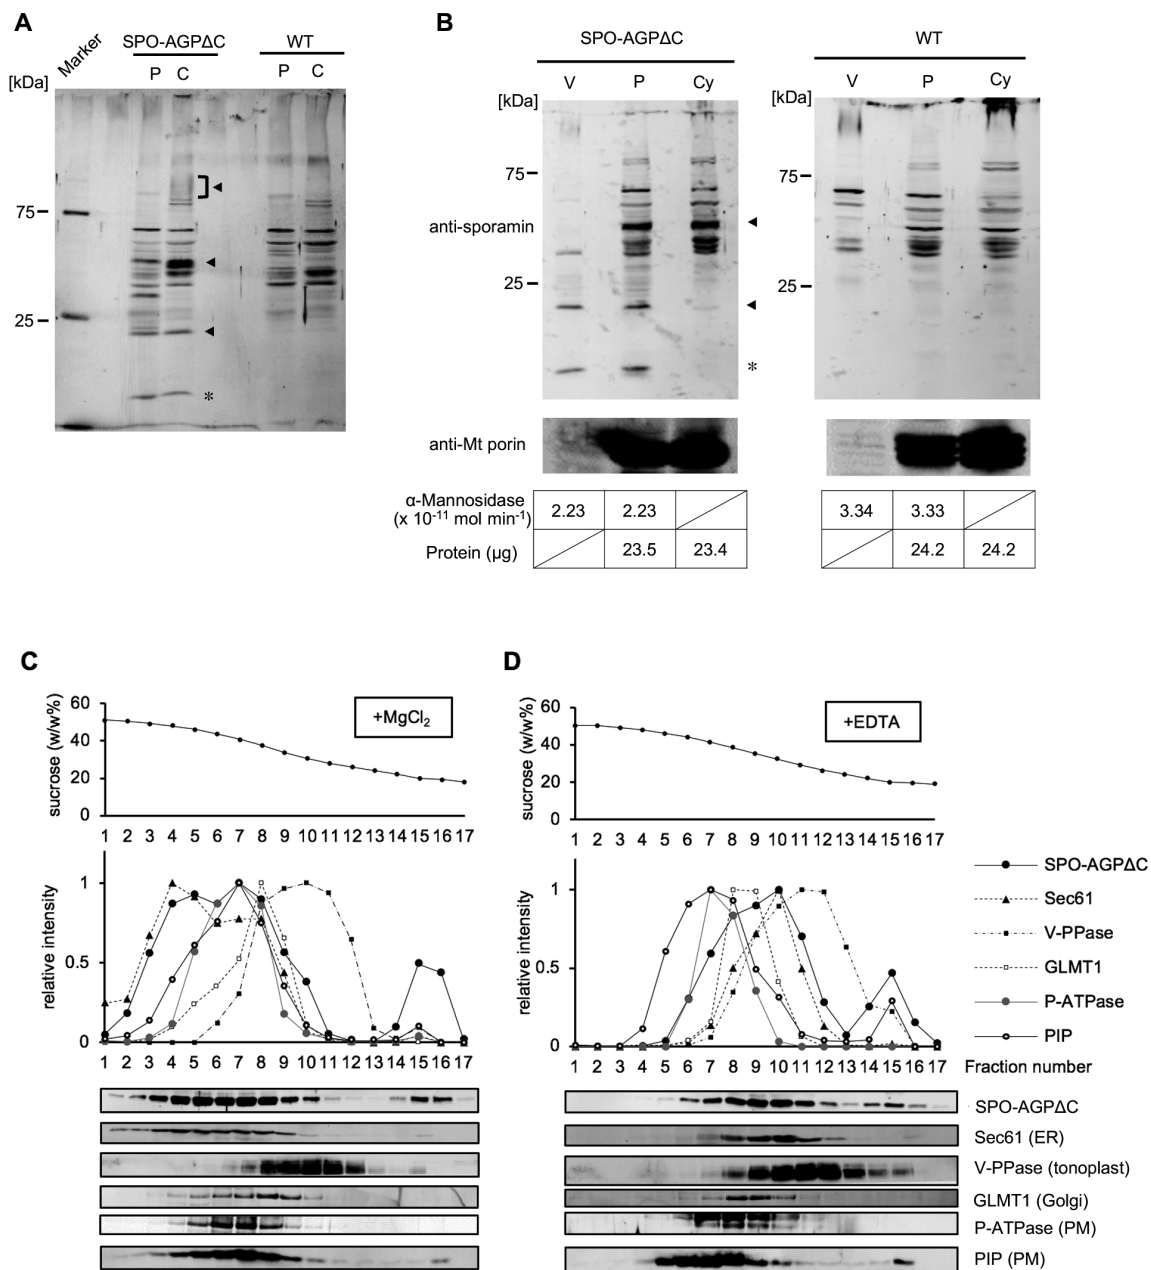

Figure 5. Distribution of different forms of SPO-AGPΔC in the cell. A: Distribution of different forms in cells and protoplasts. Protoplasts were prepared from SPO-AGPΔC-expressing cells by digesting the cell walls as described in the Materials and Methods section. Proteins in cells and protoplasts were separated by SDS-PAGE and sporamin-related polypeptides were detected by immunoblotting. As a control, protoplasts were prepared from non-transformed cells (WT) and cross-reactive polypeptides against anti-sporamin were analyzed by immunoblotting. Each lane contained 25  $\mu\text{g}$  protein. Closed arrowheads indicate the migration position of the transgene-dependent polypeptides. Asterisk indicate a possible degradation product of sporamin that was occasionally observed on immunoblots. B: Small SPO-AGPΔC was localized in the vacuoles. To assess the localization of the intermediate and small SPO-AGPΔC proteins, protoplasts were separated into vacuoplasts and cytoplasts and the distribution of SPO-AGPΔC proteins were analyzed by immunoblotting. An equal amount of the activity of  $\alpha$ -mannosidase, which is a vacuolar marker enzyme, was loaded in the vacuoplast and protoplast lanes, and nearly equal amounts of proteins were loaded into the protoplast and cytoplast lanes. As a fractionation control, mitochondrial porin was also detected by immunoblotting. C,D: Distribution of the intermediate SPO-AGPΔC within endomembrane organelles. Microsomes were prepared from SPO-AGPΔC-expressing cells in the presence of  $\text{Mg}^{2+}$  (C) or EDTA (D), subjected to isopycnic sucrose density gradient ultracentrifugation, fractionated and analyzed for the distribution of intermediate SPO-AGPΔC and marker proteins as described in the legend to Fig. 4.



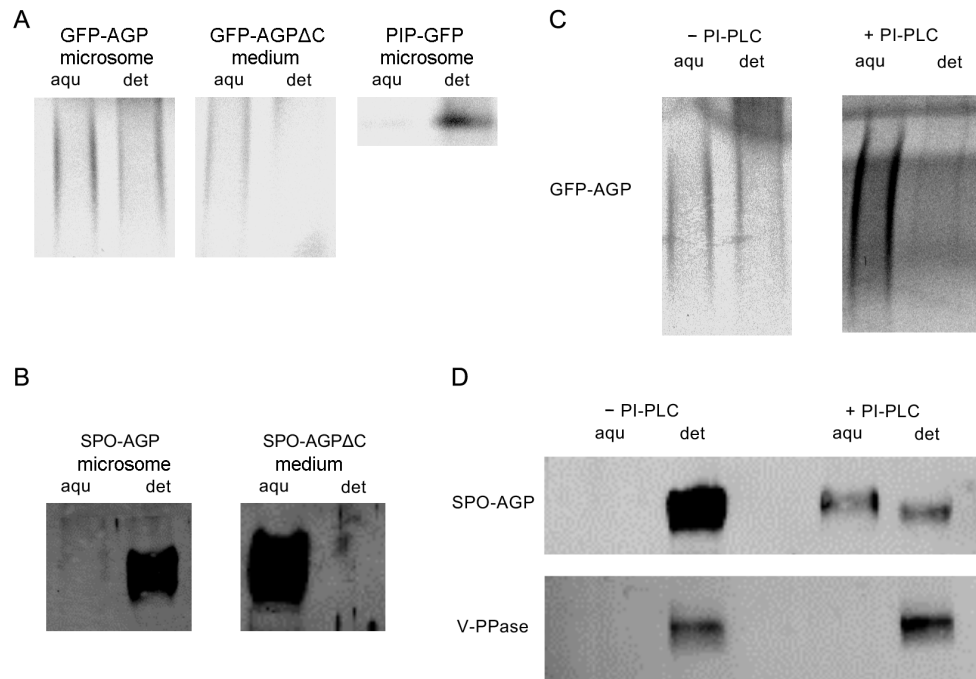

Figure 6. Both GFP-AGP and SPO-AGP are GPI-anchored proteins. A: Triton X-114 two-phase partition assay of GFP-AGP, GFP-AGPΔC and PIP-GFP. Microsomes from GFP-AGP- or PIP-GFP-expressing cells, or the culture medium of GFP-AGPΔC-expressing cells was subjected to the two-phase separation assay as described in the Materials and Methods section. Proteins in these two phases were separated by SDS-PAGE, and the fluorescence of GFP in the gel was recorded. Each lane contained proteins corresponding to an equal amount of microsomes or medium. aqu, aqueous phase; det, detergent phase. B: Triton X-114 two-phase partition assay of SPO-AGP and SPO-AGPΔC. Two-phase partition was carried out as in the legend to A. Proteins were separated by SDS-PAGE and detected by immunoblotting using anti-sporamin antibody. C: PI-PLC digestion of GFP-AGP. The two-phase partition assay was carried out in the absence and presence of PI-PLC. D: Two-phase partition assay of SPO-AGP. Microsomal proteins from SPO-AGP-expressing cells were subjected to the second-round two-phase partition assay in the absence or presence of PI-PLC. Both SPO-AGP and V-PPase, which is an integral membrane protein, were detected by immunoblotting. Each lane in these figures contained proteins corresponding to an equal amount of microsomes or medium.

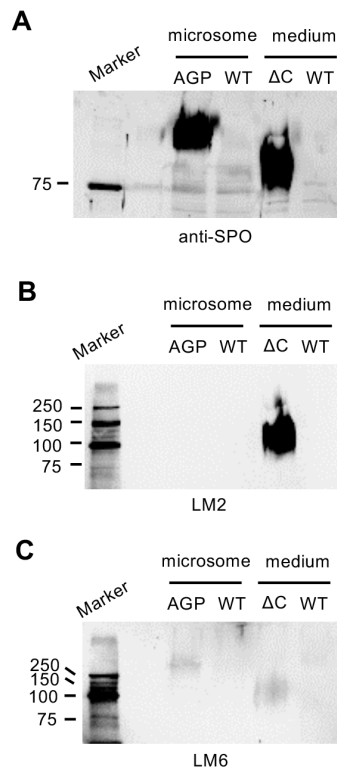

Figure 7. The large form of SPO-AGP $\Delta$ C was specifically recognized by LM2 monoclonal antibody. A: Detection by anti-sporamin antibody to show that nearly equal amount of sporamin-fusion proteins were loaded. B: Detection by the monoclonal antibody LM2, which recognizes a glycan epitope with  $\alpha$ -linked glucuronic acid. C: Detection by the monoclonal antibody LM6, which recognizes a glycan epitope consisting of (1-5)- $\alpha$ -L-arabinosyl residues. AGP, microsomes from SPO-AGP-expressing cells;  $\Delta$ C, culture medium from SPO-AGP $\Delta$ C expressing culture; WT, corresponding microsomes and medium from non-transformed BY-2 cells with an equal amount of proteins with either microsomes from SPO-AGP or culture medium from SPO-AGP $\Delta$ C.

## Parsed Citations

- Abiodun MO, Matsuoka K (2013) Evidence that proliferation of Golgi apparatus depends on both de novo generation from the endoplasmic reticulum and formation from pre-existing stacks during the growth of tobacco BY-2 cells. *Plant Cell Physiol* 54: 541-554  
Google Scholar: [Author Only](#) [Title Only](#) [Author and Title](#)
- Basu D, Liang Y, Liu X, Himmeldirk K, Faik A, Kieliszewski M, Held M, Showalter AM (2013) Functional identification of a hydroxyproline-O-galactosyltransferase specific for arabinogalactan protein biosynthesis in *Arabidopsis*. *J Biol Chem* 288: 10132-10143  
Google Scholar: [Author Only](#) [Title Only](#) [Author and Title](#)
- Basu D, Wang W, Ma S, DeBrosse T, Poirier E, Emch K, Soukup E, Tian L, Showalter AM (2015) Two hydroxyproline galactosyltransferases, GALT5 and GALT2, function in arabinogalactan-protein glycosylation, growth and development in *Arabidopsis*. *PLoS One* 10: e0125624  
Google Scholar: [Author Only](#) [Title Only](#) [Author and Title](#)
- Boller T, Kende H (1979) Hydrolytic enzymes in the central vacuole of plant cells. *Plant Physiol* 63: 1123-1132  
Google Scholar: [Author Only](#) [Title Only](#) [Author and Title](#)
- Bordier C (1981) Phase separation of integral membrane proteins in Triton X-114 solution. *J Biol Chem* 256: 1604-1607  
Google Scholar: [Author Only](#) [Title Only](#) [Author and Title](#)
- Chiu W, Niwa Y, Zeng W, Hirano T, Kobayashi H, Sheen J (1996) Engineered GFP as a vital reporter in plants. *Curr Biol* 6: 325-330  
Google Scholar: [Author Only](#) [Title Only](#) [Author and Title](#)
- De Caroli M, Lenucci MS, Di Sansebastiano GP, Dalessandro G, De Lorenzo G, Piro G (2011) Protein trafficking to the cell wall occurs through mechanisms distinguishable from default sorting in tobacco. *Plant J* 65: 295-308  
Google Scholar: [Author Only](#) [Title Only](#) [Author and Title](#)
- Dilokpimol A, Poulsen CP, Vereb G, Kaneko S, Schulz A, Geshi N (2014) Galactosyltransferases from *Arabidopsis thaliana* in the biosynthesis of type II arabinogalactan: molecular interaction enhances enzyme activity. *BMC Plant Biol* 14: 90  
Google Scholar: [Author Only](#) [Title Only](#) [Author and Title](#)
- Drakakaki G, van de Ven W, Pan S, Miao Y, Wang J, Keinath NF, Weatherly B, Jiang L, Schumacher K, Hicks G, Raikhel N (2012) Isolation and proteomic analysis of the SYP61 compartment reveal its role in exocytic trafficking in *Arabidopsis*. *Cell Res* 22: 413-424  
Google Scholar: [Author Only](#) [Title Only](#) [Author and Title](#)
- Du H, Simpson RJ, Moritz RL, Clarke AE, Bacic A (1994) Isolation of the protein backbone of an arabinogalactan-protein from the styles of *Nicotiana glauca* and characterization of a corresponding cDNA. *Plant Cell* 6: 1643-1653  
Google Scholar: [Author Only](#) [Title Only](#) [Author and Title](#)
- Emans N, Zimmermann S, Fischer R (2002) Uptake of a fluorescent marker in plant cells is sensitive to brefeldin A and wortmannin. *Plant Cell* 14: 71-86  
Google Scholar: [Author Only](#) [Title Only](#) [Author and Title](#)
- Gális I, Simek P, Narisawa T, Sasaki M, Horiguchi T, Fukuda H, Matsuoka K (2006) A novel R2R3 MYB transcription factor NtMYBJS1 is a methyl jasmonate-dependent regulator of phenylpropanoid-conjugate biosynthesis in tobacco. *Plant J* 46: 573-592  
Google Scholar: [Author Only](#) [Title Only](#) [Author and Title](#)
- Habuchi S, Tsutsui H, Kochaniak AB, Miyawaki A, van Oijen AM (2008) mKikGR, a monomeric photoswitchable fluorescent protein. *PLoS One* 3: e3944  
Google Scholar: [Author Only](#) [Title Only](#) [Author and Title](#)
- Hong E, Davidson AR, Kaiser CA (1996) A pathway for targeting soluble misfolded proteins to the yeast vacuole. *J Cell Biol* 135: 623-633  
Google Scholar: [Author Only](#) [Title Only](#) [Author and Title](#)
- Hooper NM (2001) Determination of glycosyl-phosphatidylinositol membrane protein anchorage. *Proteomics* 1: 748-755  
Google Scholar: [Author Only](#) [Title Only](#) [Author and Title](#)
- Kang BH, Nielsen E, Preuss ML, Mastrorade D, Staehelin LA (2011) Electron tomography of RabA4b- and PI-4K $\beta$ 1-labeled trans Golgi network compartments in *Arabidopsis*. *Traffic* 12: 313-329  
Google Scholar: [Author Only](#) [Title Only](#) [Author and Title](#)
- Knoch E, Dilokpimol A, Tryfona T, Poulsen CP, Xiong G, Harholt J, Petersen BL, Ulvskov P, Hadi MZ, Kotake T, Tsumuraya Y, Pauly M, Dupree P, Geshi N (2013) A  $\beta$ -glucuronosyltransferase from *Arabidopsis thaliana* involved in biosynthesis of type II arabinogalactan has a role in cell elongation during seedling growth. *Plant J* 76: 1016-1029  
Google Scholar: [Author Only](#) [Title Only](#) [Author and Title](#)
- Lind JL, Bacic A, Clarke AE, Anderson MA (1994) A style-specific hydroxyproline-rich glycoprotein with properties of both extensins and arabinogalactan proteins. *Plant J* 6: 491-502  
Google Scholar: [Author Only](#) [Title Only](#) [Author and Title](#)
- Liu J, Hayashi K, Matsuoka K (2015) Membrane topology of Golgi-localized probable S-adenosylmethionine-dependent methyltransferase in tobacco (*Nicotiana tabacum*) BY-2 cells. *Biosci Biotechnol Biochem* 79: 2007-2013

Google Scholar: [Author Only](#) [Title Only](#) [Author and Title](#)

**Liu YS, Fujita M (2020) Mammalian GPI-anchor modifications and the enzymes involved. *Biochem Soc Trans* 48: 1129-1138**

Google Scholar: [Author Only](#) [Title Only](#) [Author and Title](#)

**Matsuoka K, Demura T, Galis I, Horiguchi T, Sasaki M, Tashiro G, Fukuda H (2004) A comprehensive gene expression analysis toward the understanding of growth and differentiation of tobacco BY-2 cells. *Plant and Cell Physiology* 45: 1280-1289**

Google Scholar: [Author Only](#) [Title Only](#) [Author and Title](#)

**Matsuoka K, Higuchi T, Maeshima M, Nakamura K (1997) A Vacuolar-Type H<sup>+</sup>-ATPase in a nonvacuolar organelle is required for the sorting of soluble vacuolar protein precursors in tobacco cells. *Plant Cell* 9: 533-546**

Google Scholar: [Author Only](#) [Title Only](#) [Author and Title](#)

**Matsuoka K, Nakamura K (1991) Propeptide of a precursor to a plant vacuolar protein required for vacuolar targeting. *Proc Natl Acad Sci U S A* 88: 834-838**

Google Scholar: [Author Only](#) [Title Only](#) [Author and Title](#)

**Matsuoka K, Nakamura K (1999) Large alkyl side-chains of isoleucine and leucine in the NPIRL region constitute the core of the vacuolar sorting determinant of sporamin precursor. *Plant Mol Biol* 41: 825-835**

Google Scholar: [Author Only](#) [Title Only](#) [Author and Title](#)

**Matsuoka K, Watanabe N, Nakamura K (1995) O-glycosylation of a precursor to a sweet potato vacuolar protein, sporamin, expressed in tobacco cells. *Plant Journal* 8: 877-889**

Google Scholar: [Author Only](#) [Title Only](#) [Author and Title](#)

**Maurer JB, Bacic A, Pereira-Netto AB, Donatti L, Zawadzki-Baggio SF, Pettolino FA (2010) Arabinogalactan-proteins from cell suspension cultures of *Araucaria angustifolia*. *Phytochemistry* 71: 1400-1409**

Google Scholar: [Author Only](#) [Title Only](#) [Author and Title](#)

**Murata D, Nomura KH, Dejima K, Mizuguchi S, Kawasaki N, Matsuishi-Nakajima Y, Ito S, Gengyo-Ando K, Kage-Nakadai E, Mitani S, Nomura K (2012) GPI-anchor synthesis is indispensable for the germline development of the nematode *Caenorhabditis elegans*. *Mol Biol Cell* 23: 982-995**

Google Scholar: [Author Only](#) [Title Only](#) [Author and Title](#)

**Nagata T, Okada K, Takebe I, Matsui C (1981) Delivery of tobacco mosaic virus RNA into plant protoplasts mediated by reverse-phase evaporation vesicles (liposomes). *Molecular & General Genetics* 184: 161-165**

Google Scholar: [Author Only](#) [Title Only](#) [Author and Title](#)

**Norman P, Wingate V, Fitter M, Lamb C (1986) Monoclonal-antibodies to plant plasma-membrane antigens. *Planta* 167: 452-459**

Google Scholar: [Author Only](#) [Title Only](#) [Author and Title](#)

**Oda Y, Asatsuma S, Nakasone H, Matsuoka K (2020) Sucrose starvation induces the degradation of proteins in trans-Golgi network and secretory vesicle cluster in tobacco BY-2 cells. *Bioscience Biotechnology and Biochemistry* 84: 1652-1666**

Google Scholar: [Author Only](#) [Title Only](#) [Author and Title](#)

**Ogawa-Ohnishi M, Matsubayashi Y (2015) Identification of three potent hydroxyproline O-galactosyltransferases in *Arabidopsis*. *Plant J* 81: 736-746**

Google Scholar: [Author Only](#) [Title Only](#) [Author and Title](#)

**Oka T, Saito F, Shimma Y, Yoko-o T, Nomura Y, Matsuoka K, Jigami Y (2010) Characterization of endoplasmic reticulum-localized UDP-D-galactose: hydroxyproline O-galactosyltransferase using synthetic peptide substrates in *Arabidopsis*. *Plant Physiol* 152: 332-340**

Google Scholar: [Author Only](#) [Title Only](#) [Author and Title](#)

**Paris N, Rogers SW, Jiang L, Kirsch T, Beevers L, Phillips TE, Rogers JC (1997) Molecular cloning and further characterization of a probable plant vacuolar sorting receptor. *Plant Physiol* 115: 29-39**

Google Scholar: [Author Only](#) [Title Only](#) [Author and Title](#)

**Parsons HT, Stevens TJ, McFarlane HE, Vidal-Melgosa S, Griss J, Lawrence N, Butler R, Sousa MML, Salemi M, Willats WGT, Petzold CJ, Heazlewood JL, Lilley KS (2019) Separating Golgi proteins from cis to trans reveals underlying properties of cisternal localization. *Plant Cell* 31: 2010-2034**

Google Scholar: [Author Only](#) [Title Only](#) [Author and Title](#)

**Pereira AM, Pereira LG, Coimbra S (2015) Arabinogalactan proteins: rising attention from plant biologists. *Plant Reprod* 28: 1-15**

Google Scholar: [Author Only](#) [Title Only](#) [Author and Title](#)

**Poulsen CP, Dilokpimol A, Geshi N (2015) Arabinogalactan biosynthesis: Implication of AtGALT29A enzyme activity regulated by phosphorylation and co-localized enzymes for nucleotide sugar metabolism in the compartments outside of the Golgi apparatus. *Plant Signal Behav* 10: e984524**

Google Scholar: [Author Only](#) [Title Only](#) [Author and Title](#)

**Poulsen CP, Dilokpimol A, Mouille G, Burow M, Geshi N (2014) Arabinogalactan glycosyltransferases target to a unique subcellular compartment that may function in unconventional secretion in plants. *Traffic* 15: 1219-1234**

Google Scholar: [Author Only](#) [Title Only](#) [Author and Title](#)

Putoczki TL, Pettolino F, Griffin MD, Möller R, Gerrard JA, Bacic A, Jackson SL (2007) Characterization of the structure, expression and function of Pinus radiata D. Don arabinogalactan-proteins. *Planta* 226: 1131-1142

Google Scholar: [Author Only](#) [Title Only](#) [Author and Title](#)

Sonobe S (1990) Cytochalasin B cytokinetic cleavage in miniprotoplast isolated from cultured tobacco cells. *Protoplasma* 155: 239-242

Google Scholar: [Author Only](#) [Title Only](#) [Author and Title](#)

Shimizu M, Igasaki T, Yamada M, Yuasa K, Hasegawa J, Kato T, Tsukagoshi H, Nakamura K, Fukuda H, Matsuoka K (2005) Experimental determination of proline hydroxylation and hydroxyproline arabinogalactosylation motifs in secretory proteins. *Plant J* 42: 877-889

Google Scholar: [Author Only](#) [Title Only](#) [Author and Title](#)

Showalter AM, Basu D (2016) Extensin and arabinogalactan-protein biosynthesis: Glycosyltransferases, research challenges, and biosensors. *Front Plant Sci* 7: 814

Google Scholar: [Author Only](#) [Title Only](#) [Author and Title](#)

Showalter AM, Keppler B, Lichtenberg J, Gu D, Welch LR (2010) A bioinformatics approach to the identification, classification, and analysis of hydroxyproline-rich glycoproteins. *Plant Physiol* 153: 485-513

Google Scholar: [Author Only](#) [Title Only](#) [Author and Title](#)

Singh H, Ansari HR, Raghava GP (2013) Improved method for linear B-cell epitope prediction using antigen's primary sequence. *PLoS One* 8: e62216

Google Scholar: [Author Only](#) [Title Only](#) [Author and Title](#)

Steffan W, Kováčč P, Albersheim P, Darvill A, Hahn M (1995) Characterization of a monoclonal antibody that recognizes an arabinosylated (1- $\beta$ )-D-galactan epitope in plant complex carbohydrates. *Carbohydrate Research* 275: 295-307

Google Scholar: [Author Only](#) [Title Only](#) [Author and Title](#)

Suga S, Imagawa S, Maeshima M (2001) Specificity of the accumulation of mRNAs and proteins of the plasma membrane and tonoplast aquaporins in radish organs. *Planta* 212: 294-304

Google Scholar: [Author Only](#) [Title Only](#) [Author and Title](#)

Tan L, Qiu F, Lampert DT, Kieliszewski MJ (2004) Structure of a hydroxyproline (Hyp)-arabinogalactan polysaccharide from repetitive Ala-Hyp expressed in transgenic *Nicotiana tabacum*. *J Biol Chem* 279: 13156-13165

Google Scholar: [Author Only](#) [Title Only](#) [Author and Title](#)

Tan L, Varnai P, Lampert DT, Yuan C, Xu J, Qiu F, Kieliszewski MJ (2010) Plant O-hydroxyproline arabinogalactans are composed of repeating trigalactosyl subunits with short bifurcated side chains. *J Biol Chem* 285: 24575-24583

Google Scholar: [Author Only](#) [Title Only](#) [Author and Title](#)

Tasaki M, Asatsuma S, Matsuoka K (2014) Monitoring protein turnover during phosphate starvation-dependent autophagic degradation using a photoconvertible fluorescent protein aggregate in tobacco BY-2 cells. *Front Plant Sci* 5: 172

Google Scholar: [Author Only](#) [Title Only](#) [Author and Title](#)

Temple H, Mortimer JC, Tryfona T, Yu X, Lopez-Hernandez F, Sorieul M, Anders N, Dupree P (2019) Two members of the DUF579 family are responsible for arabinogalactan methylation in *Arabidopsis*. *Plant Direct* 3: e00117

Google Scholar: [Author Only](#) [Title Only](#) [Author and Title](#)

Toyooka K, Goto Y, Asatsuma S, Koizumi M, Mitsui T, Matsuoka K (2009) A mobile secretory vesicle cluster involved in mass transport from the Golgi to the plant cell exterior. *Plant Cell* 21: 1212-1229

Google Scholar: [Author Only](#) [Title Only](#) [Author and Title](#)

Tryfona T, Liang HC, Kotake T, Tsumuraya Y, Stephens E, Dupree P (2012) Structural characterization of *Arabidopsis* leaf arabinogalactan polysaccharides. *Plant Physiol* 160: 653-666

Google Scholar: [Author Only](#) [Title Only](#) [Author and Title](#)

Uemura T, Nakano RT, Takagi J, Wang Y, Kramer K, Finkemeier I, Nakagami H, Tsuda K, Ueda T, Schulze-Lefert P, Nakano A (2019) A Golgi-released subpopulation of the trans-Golgi network mediates protein secretion in *Arabidopsis*. *Plant Physiol* 179: 519-532

Google Scholar: [Author Only](#) [Title Only](#) [Author and Title](#)

Uemura T, Suda Y, Ueda T, Nakano A (2014) Dynamic behavior of the trans-golgi network in root tissues of *Arabidopsis* revealed by super-resolution live imaging. *Plant Cell Physiol* 55: 694-703

Google Scholar: [Author Only](#) [Title Only](#) [Author and Title](#)

VandenBosch K, Bradley D, Knox J, Perotto S, Butcher G, Brewin N (1989) Common components of the infection thread matrix and the intercellular space identified by immunocytochemical analysis of pea nodules and uninfected roots. *EMBO Journal* 8: 335-341

Google Scholar: [Author Only](#) [Title Only](#) [Author and Title](#)

Velasquez SM, Ricardi MM, Poulsen CP, Oikawa A, Dilokpimol A, Halim A, Mangano S, Denita Juarez SP, Marzol E, Salgado Salter JD, Dorosz JG, Borassi C, Möller SR, Buono R, Ohsawa Y, Matsuoka K, Otegui MS, Scheller HV, Geshi N, Petersen BL, Iusem ND, Estevez JM (2015) Complex regulation of prolyl-4-hydroxylases impacts root hair expansion. *Mol Plant* 8: 734-746

Google Scholar: [Author Only](#) [Title Only](#) [Author and Title](#)

Viotti C, Bubeck J, Stierhof YD, Krebs M, Langhans M, van den Berg W, van Dongen W, Richter S, Geldner N, Takano J, Jürgens G, de Vries SC, Robinson DG, Schumacher K (2010) Endocytic and secretory traffic in *Arabidopsis* merge in the trans-Golgi network/early

**endosome, an independent and highly dynamic organelle. Plant Cell 22: 1344-1357**

Google Scholar: [Author Only](#) [Title Only](#) [Author and Title](#)

**Wilkop T, Pattathil S, Ren G, Davis DJ, Bao W, Duan D, Peralta AG, Domozych DS, Hahn MG, Drakakaki G (2019) A hybrid approach enabling large-scale glycomic analysis of post-Golgi vesicles reveals a transport route for polysaccharides. Plant Cell 31: 627-644**

Google Scholar: [Author Only](#) [Title Only](#) [Author and Title](#)

**Xu J, Tan L, Lamport DT, Showalter AM, Kieliszewski MJ (2008) The O-Hyp glycosylation code in tobacco and Arabidopsis and a proposed role of Hyp-glycans in secretion. Phytochemistry 69: 1631-1640**

Google Scholar: [Author Only](#) [Title Only](#) [Author and Title](#)

**Yamauchi N, Gosho T, Asatuma S, Toyooka K, Fujiwara T, Matsuoka K (2013) Polarized localization and borate-dependent degradation of the Arabidopsis borate transporter BOR1 in tobacco BY-2 cells. F1000Res 2: 185**

Google Scholar: [Author Only](#) [Title Only](#) [Author and Title](#)

**Yates EA, Valdor JF, Haslam SM, Morris HR, Dell A, Mackie W, Knox JP (1996) Characterization of carbohydrate structural features recognized by anti-arabinogalactan-protein monoclonal antibodies. Glycobiology 6: 131-139**

Google Scholar: [Author Only](#) [Title Only](#) [Author and Title](#)

**Yeats TH, Bacic A, Johnson KL (2018) Plant glycosylphosphatidylinositol anchored proteins at the plasma membrane-cell wall nexus. J Integr Plant Biol 60: 649-669**

Google Scholar: [Author Only](#) [Title Only](#) [Author and Title](#)

**Yuasa K, Toyooka K, Fukuda H, Matsuoka K (2005) Membrane-anchored prolyl hydroxylase with an export signal from the endoplasmic reticulum. Plant J 41: 81-94**

Google Scholar: [Author Only](#) [Title Only](#) [Author and Title](#)
